# Supplementary material
Source: Research Square preprint supplement (doi:10.21203/rs.3.rs-8914167/v1)
Supplement: Supplementary file 1 [file 20dd4fdeb6eb9ef560c70e37.pdf]

# **Electronic and Geometric Effects of Dual-Atom Catalysts on C–C Coupling during CO<sub>2</sub> Reduction: Insights from Density Functional Theory and Interpretable Machine Learning**

Chenglong Qiu<sup>1</sup>, Tore Brinck<sup>2</sup>, and Jiacheng Wang<sup>1,\*</sup>

<sup>1</sup> Zhejiang Key Laboratory for Island Green Energy and New Materials, Institute of Electrochemistry, School of Materials Science and Engineering, Taizhou University, Taizhou 318000, Zhejiang, China

<sup>2</sup> Department of Chemistry, CBH, KTH Royal Institute of Technology, SE-100 44 Stockholm, Sweden

Email: [jiacheng.wang@tzc.edu.cn](mailto:jiacheng.wang@tzc.edu.cn)

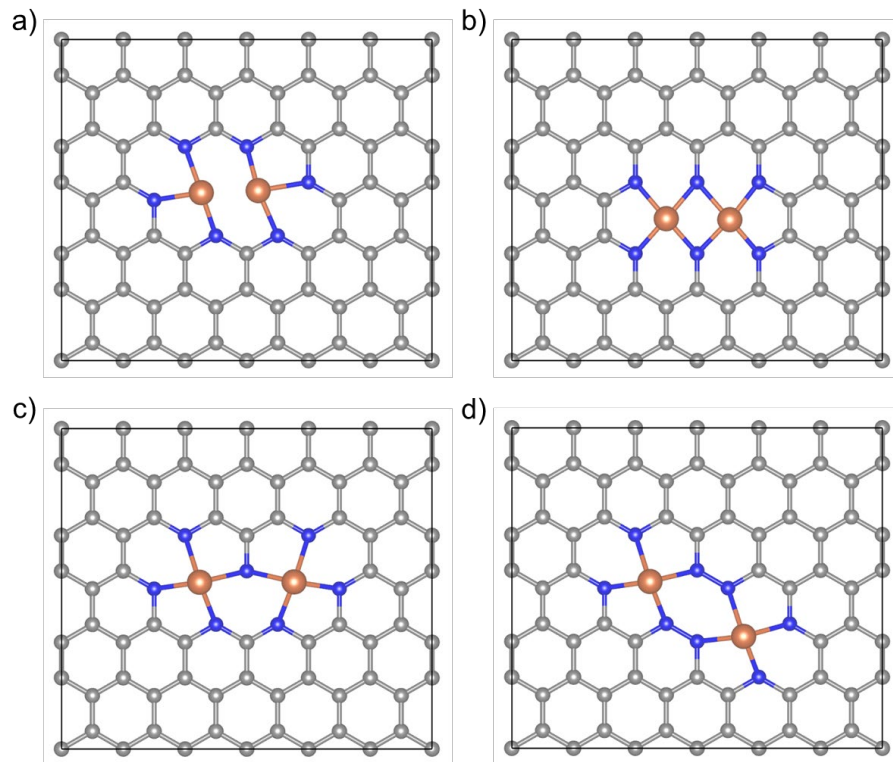

**Figure S1.** Four coordination configurations ( $M_2@NG_1$ ,  $M_2@NG_2$ ,  $M_2@NG_3$ , and  $M_2@NG_4$ ) used in this work.

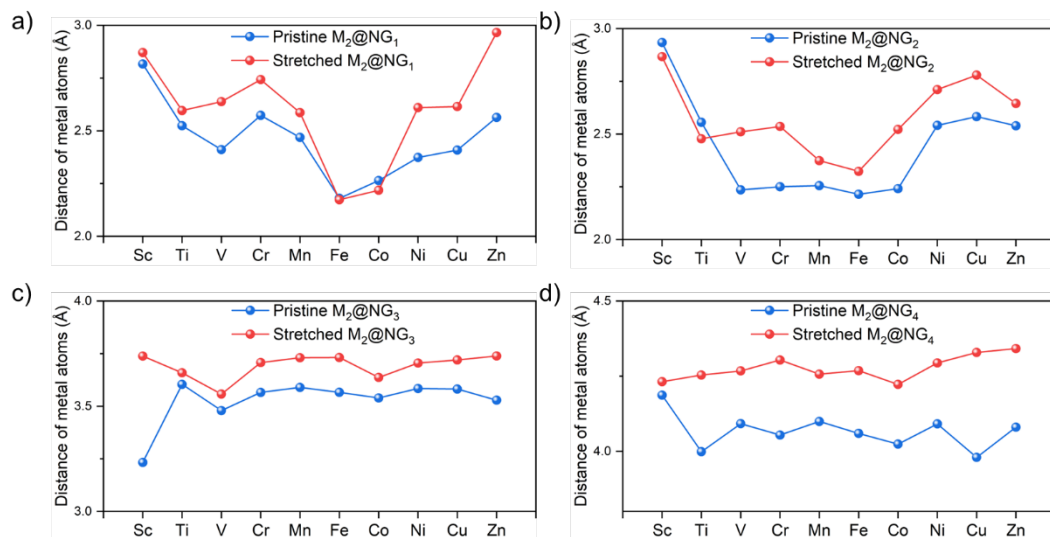

**Figure S2.** The distance of metal atoms before and after stretching for the four coordination structures

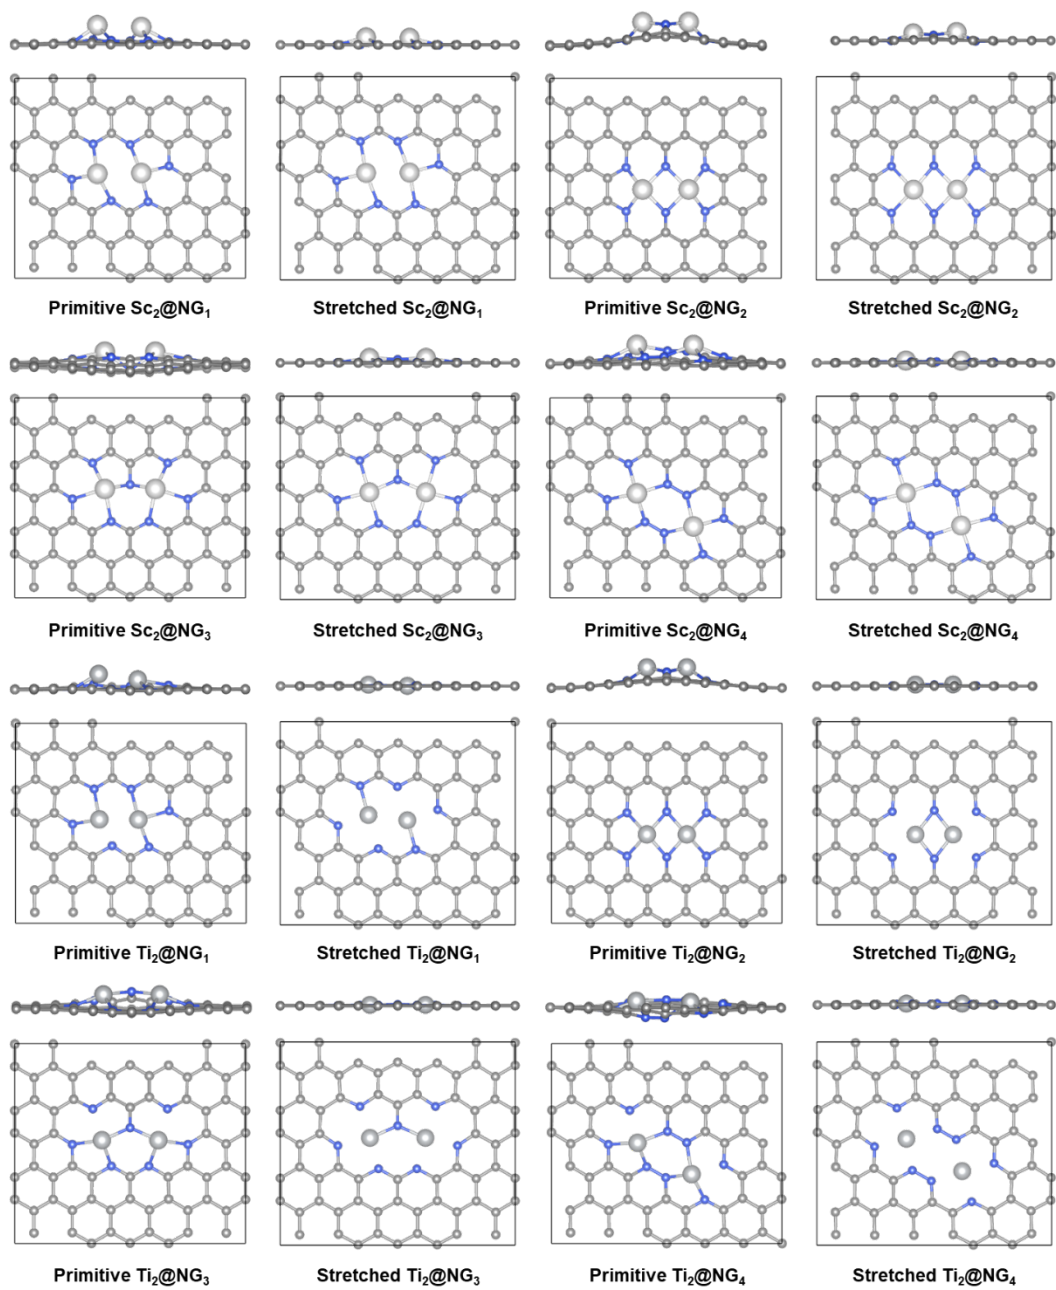

**Figure S3.** Optimized structures of  $\text{Sc}_2@NG_x$  and  $\text{Ti}_2@NG_x$  obtained from DFT calculations.

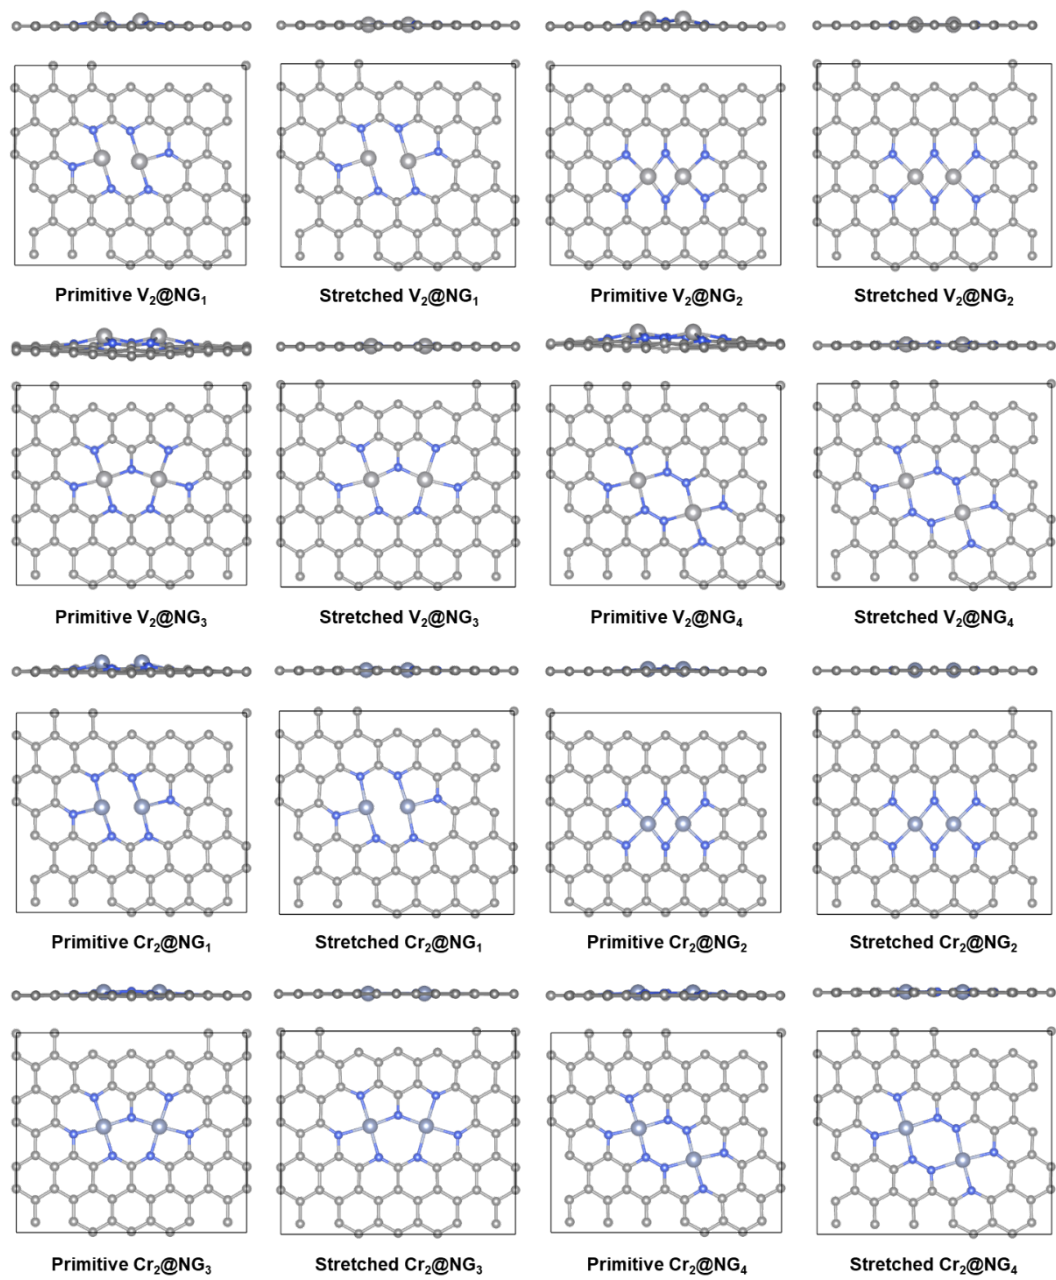

**Figure S4.** Optimized structures of  $V_2@NG_x$  and  $Cr_2@NG_x$  obtained from DFT calculations.

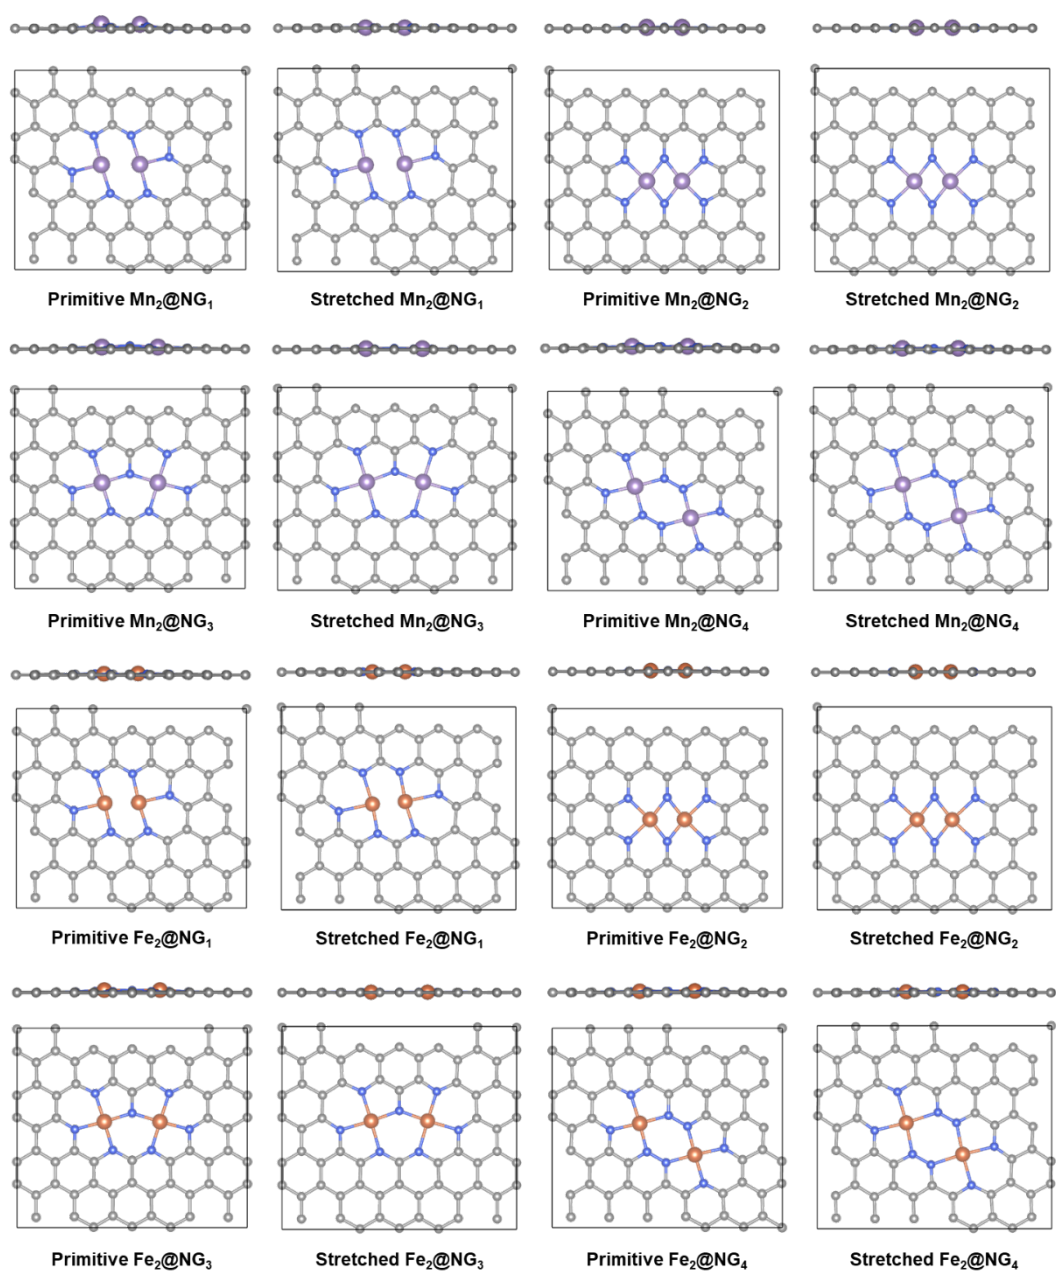

**Figure S5.** Optimized structures of  $\text{Mn}_2@NG_x$  and  $\text{Fe}_2@NG_x$  obtained from DFT calculations.

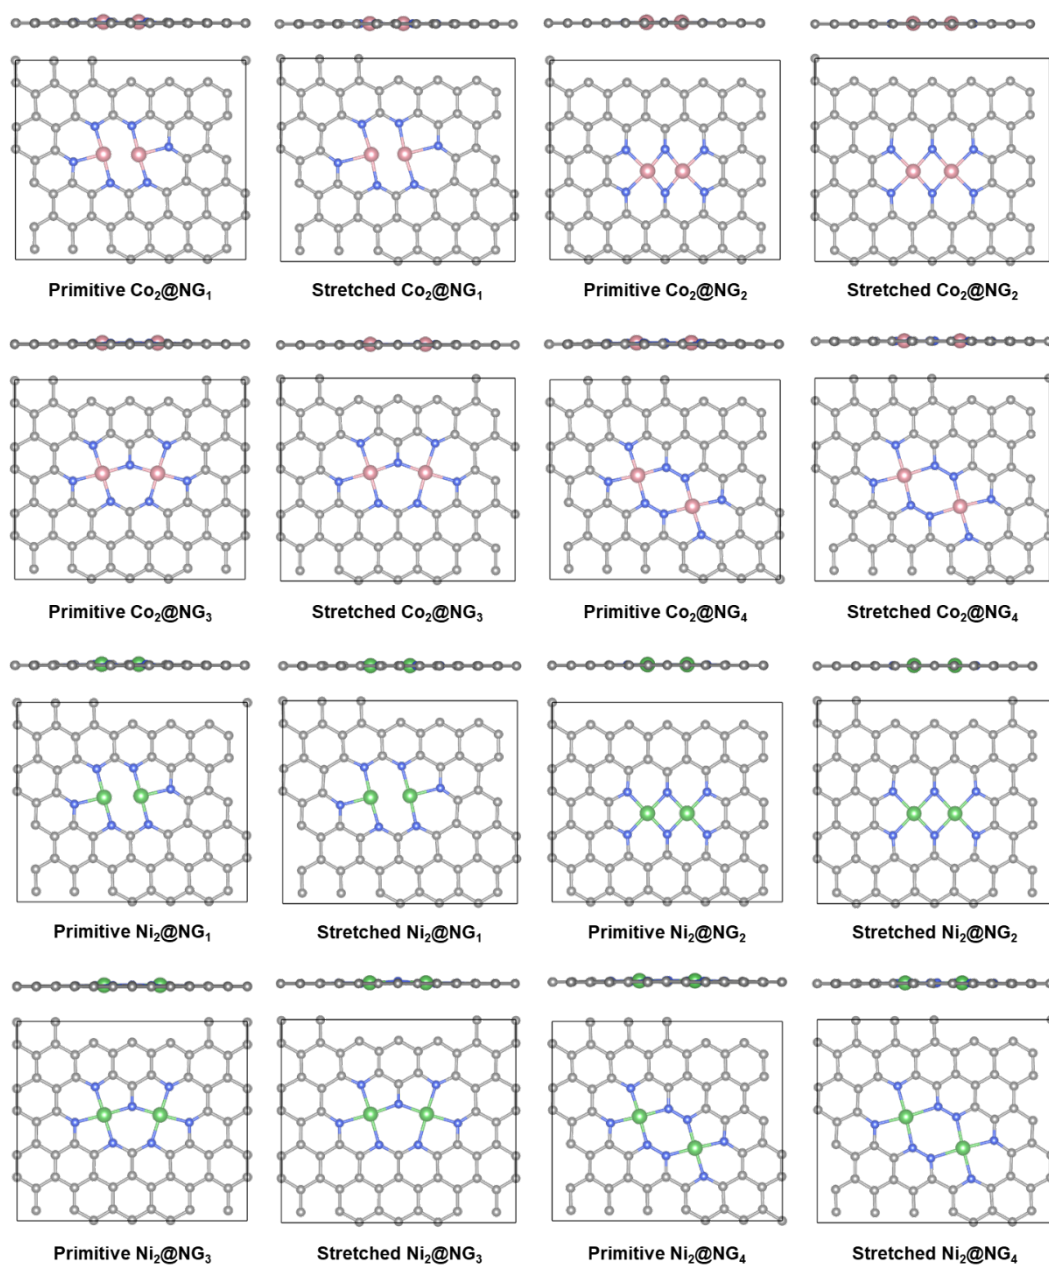

**Figure S6.** Optimized structures of  $\text{Co}_2@NG_x$  and  $\text{Ni}_2@NG_x$  obtained from DFT calculations.

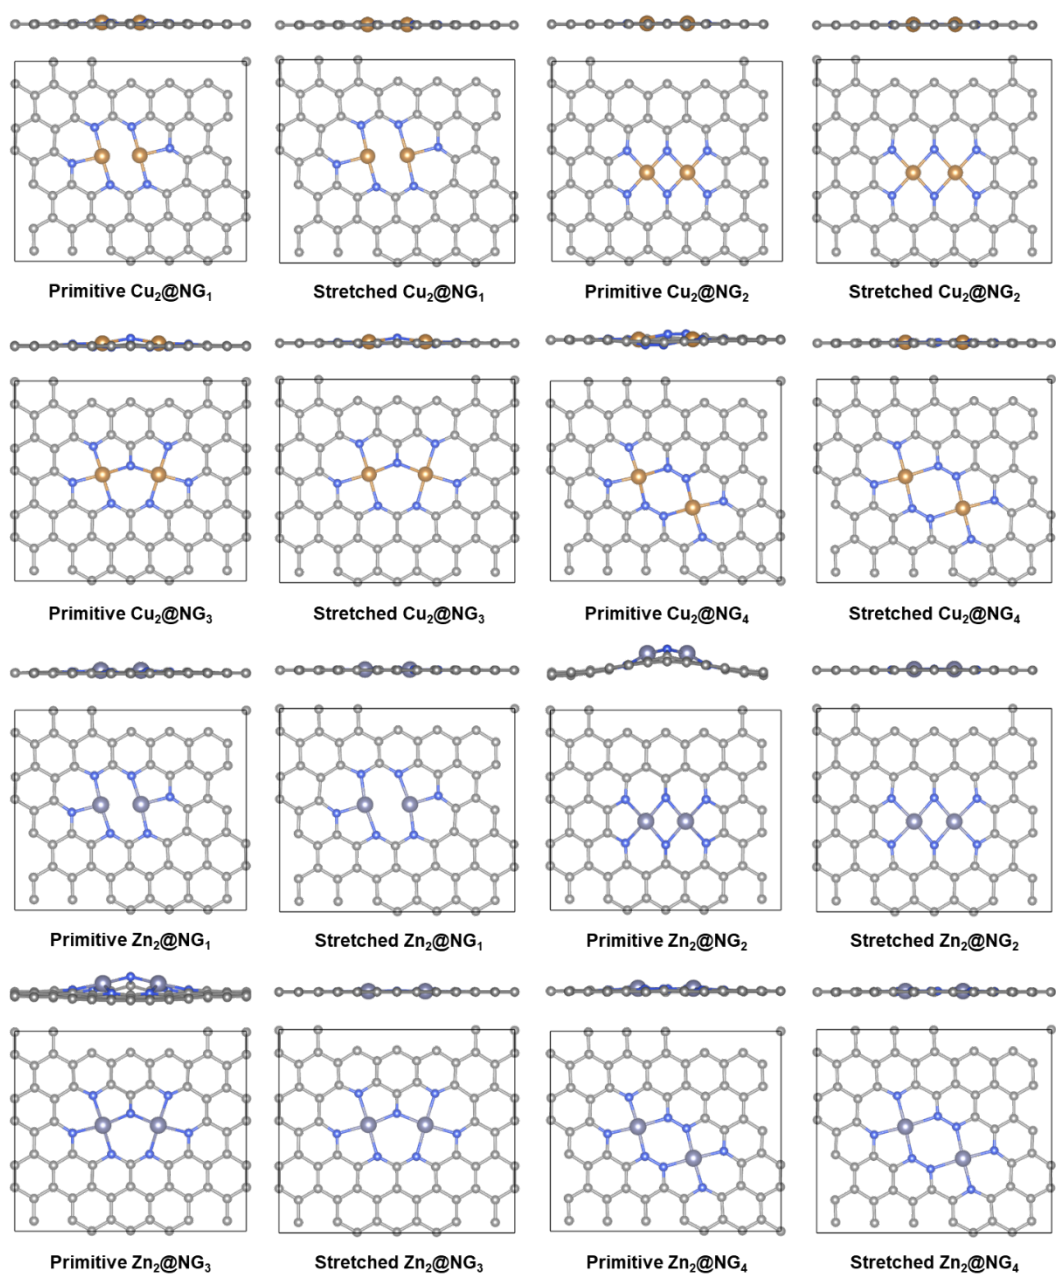

**Figure S7.** Optimized structures of  $\text{Cu}_2@NG_x$  and  $\text{Zn}_2@NG_x$  obtained from DFT calculations.

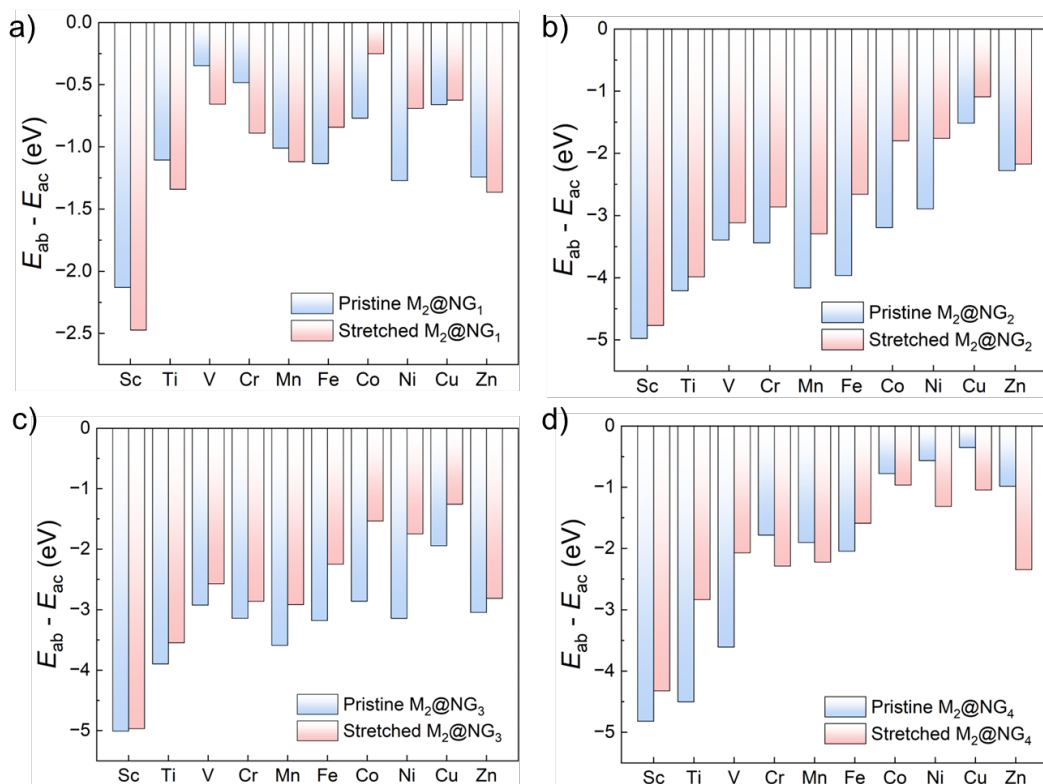

**Figure S8.** Differences between the average binding energies ( $E_{ab}$ ) and the cohesive energies ( $E_{ac}$ ) of a)  $M_2@NG_1$ , b)  $M_2@NG_2$ , c)  $M_2@NG_3$  and d)  $M_2@NG_4$ .

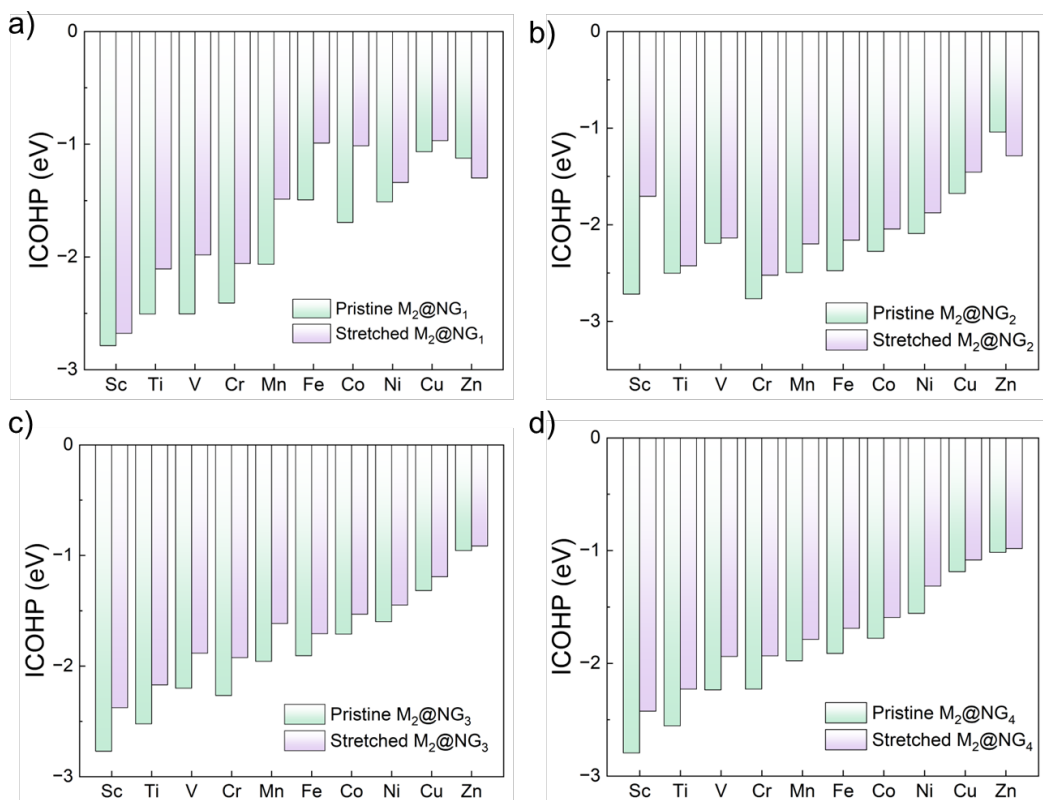

**Figure S9.** IpCOHPs values of the M–N bond in a)  $M_2@NG_1$ , b)  $M_2@NG_2$ , c)  $M_2@NG_3$  and d)  $M_2@NG_4$ .

**Table S1.** The vibrational frequencies (THz) of the dual-atom sites in Sc<sub>2</sub>@NG<sub>x</sub>.

| Mode | Primitive<br>Sc <sub>2</sub> @NG <sub>1</sub> | Stretched<br>Sc <sub>2</sub> @NG <sub>1</sub> | Primitive<br>Sc <sub>2</sub> @NG <sub>2</sub> | Stretched<br>Sc <sub>2</sub> @NG <sub>2</sub> | Primitive<br>Sc <sub>2</sub> @NG <sub>3</sub> | Stretched<br>Sc <sub>2</sub> @NG <sub>3</sub> | Primitive<br>Sc <sub>2</sub> @NG <sub>4</sub> | Stretched<br>Sc <sub>2</sub> @NG <sub>4</sub> |
|------|-----------------------------------------------|-----------------------------------------------|-----------------------------------------------|-----------------------------------------------|-----------------------------------------------|-----------------------------------------------|-----------------------------------------------|-----------------------------------------------|
| 1    | 9.316773                                      | 9.004974                                      | 10.920667                                     | 11.004719                                     | 10.166779                                     | 10.099946                                     | 9.607972                                      | 8.442071                                      |
| 2    | 8.967372                                      | 7.738182                                      | 10.347725                                     | 10.134674                                     | 9.326864                                      | 8.640436                                      | 9.392005                                      | 8.362029                                      |
| 3    | 7.71301                                       | 7.301387                                      | 8.383973                                      | 7.445307                                      | 9.033565                                      | 8.570755                                      | 8.635332                                      | 7.634694                                      |
| 4    | 6.996057                                      | 6.77365                                       | 7.966135                                      | 5.830091                                      | 8.881757                                      | 7.556193                                      | 8.628472                                      | 7.480081                                      |
| 5    | 5.993831                                      | 3.18848                                       | 7.222447                                      | 4.544677                                      | 7.444548                                      | 2.839287                                      | 7.38396                                       | 2.185778                                      |
| 6    | 4.011628                                      | 2.299929                                      | 5.611131                                      | 0.915953                                      | 7.117348                                      | 2.01292                                       | 7.183701                                      | 1.106289                                      |

**Table S2.** The vibrational frequencies (THz) of the dual-atom sites in Ti<sub>2</sub>@NG<sub>x</sub>.

| Mode | Primitive<br>Ti <sub>2</sub> @NG <sub>1</sub> | Stretched<br>Ti <sub>2</sub> @NG <sub>1</sub> | Primitive<br>Ti <sub>2</sub> @NG <sub>2</sub> | Stretched<br>Ti <sub>2</sub> @NG <sub>2</sub> | Primitive<br>Ti <sub>2</sub> @NG <sub>3</sub> | Stretched<br>Ti <sub>2</sub> @NG <sub>3</sub> | Primitive<br>Ti <sub>2</sub> @NG <sub>4</sub> | Stretched<br>Ti <sub>2</sub> @NG <sub>4</sub> |
|------|-----------------------------------------------|-----------------------------------------------|-----------------------------------------------|-----------------------------------------------|-----------------------------------------------|-----------------------------------------------|-----------------------------------------------|-----------------------------------------------|
| 1    | 10.57387                                      | 9.84755                                       | 12.56294                                      | 12.78372                                      | 10.32801                                      | 9.213594                                      | 10.59982                                      | 7.658709                                      |
| 2    | 9.694974                                      | 8.923023                                      | 11.77867                                      | 10.37232                                      | 9.287821                                      | 8.22969                                       | 10.36844                                      | 7.294945                                      |
| 3    | 7.816784                                      | 7.882945                                      | 9.955684                                      | 8.784915                                      | 9.210605                                      | 7.482461                                      | 10.27165                                      | 6.40705                                       |
| 4    | 7.569598                                      | 5.097188                                      | 8.178171                                      | 7.692146                                      | 8.348985                                      | 5.098973                                      | 10.02448                                      | 6.058661                                      |
| 5    | 5.557177                                      | 2.889661                                      | 7.187455                                      | 3.087299                                      | 5.643901                                      | 3.031698                                      | 6.472319                                      | 4.261046                                      |
| 6    | 3.133584                                      | 1.604609                                      | 5.403919                                      | 2.395648                                      | 5.60383                                       | 2.686022                                      | 6.262583                                      | 4.088917                                      |

**Table S3.** The vibrational frequencies (THz) of the dual-atom sites in V<sub>2</sub>@NG<sub>x</sub>.

| Mode | Primitive<br>V <sub>2</sub> @NG <sub>1</sub> | Stretched<br>V <sub>2</sub> @NG <sub>1</sub> | Primitive<br>V <sub>2</sub> @NG <sub>2</sub> | Stretched<br>V <sub>2</sub> @NG <sub>2</sub> | Primitive<br>V <sub>2</sub> @NG <sub>3</sub> | Stretched<br>V <sub>2</sub> @NG <sub>3</sub> | Primitive<br>V <sub>2</sub> @NG <sub>4</sub> | Stretched<br>V <sub>2</sub> @NG <sub>4</sub> |
|------|----------------------------------------------|----------------------------------------------|----------------------------------------------|----------------------------------------------|----------------------------------------------|----------------------------------------------|----------------------------------------------|----------------------------------------------|
| 1    | 12.05213                                     | 9.238933                                     | 16.50098                                     | 12.66636                                     | 11.5156                                      | 9.810043                                     | 10.89707                                     | 8.847403                                     |
| 2    | 11.48185                                     | 8.700731                                     | 13.66681                                     | 9.941802                                     | 10.62282                                     | 9.040535                                     | 10.81714                                     | 8.695482                                     |
| 3    | 11.23423                                     | 7.78796                                      | 13.43959                                     | 7.687982                                     | 8.98066                                      | 7.125997                                     | 9.264744                                     | 7.423337                                     |
| 4    | 7.806956                                     | 6.122759                                     | 10.97417                                     | 6.695414                                     | 8.68685                                      | 5.916034                                     | 9.176639                                     | 6.513621                                     |
| 5    | 2.454013                                     | 3.578786                                     | 4.397134                                     | 4.815498                                     | 5.799825                                     | 4.148066                                     | 5.504205                                     | 4.496506                                     |
| 6    | 0.938059                                     | 3.333083                                     | 3.482074                                     | 4.224605                                     | 5.615928                                     | 2.646662                                     | 5.249116                                     | 4.355659                                     |

**Table S4.** The vibrational frequencies (THz) of the dual-atom sites in Cr<sub>2</sub>@NG<sub>x</sub>.

| Mode | Primitive<br>Cr <sub>2</sub> @NG <sub>1</sub> | Stretched<br>Cr <sub>2</sub> @NG <sub>1</sub> | Primitive<br>Cr <sub>2</sub> @NG <sub>2</sub> | Stretched<br>Cr <sub>2</sub> @NG <sub>2</sub> | Primitive<br>Cr <sub>2</sub> @NG <sub>3</sub> | Stretched<br>Cr <sub>2</sub> @NG <sub>3</sub> | Primitive<br>Cr <sub>2</sub> @NG <sub>4</sub> | Stretched<br>Cr <sub>2</sub> @NG <sub>4</sub> |
|------|-----------------------------------------------|-----------------------------------------------|-----------------------------------------------|-----------------------------------------------|-----------------------------------------------|-----------------------------------------------|-----------------------------------------------|-----------------------------------------------|
| 1    | 11.55152                                      | 9.64191                                       | 16.46828                                      | 12.45979                                      | 12.68443                                      | 9.551832                                      | 12.88626                                      | 8.656729                                      |
| 2    | 10.78657                                      | 8.316507                                      | 13.71297                                      | 9.189695                                      | 12.22443                                      | 9.016957                                      | 12.21739                                      | 8.409364                                      |
| 3    | 10.76054                                      | 8.068488                                      | 13.23759                                      | 7.206016                                      | 11.39507                                      | 7.925769                                      | 10.84024                                      | 7.041526                                      |
| 4    | 8.510663                                      | 6.809016                                      | 12.01326                                      | 6.562672                                      | 10.56674                                      | 7.231154                                      | 10.37024                                      | 6.960596                                      |
| 5    | 3.353542                                      | 4.183344                                      | 5.050871                                      | 5.328826                                      | 3.778072                                      | 4.959091                                      | 4.012748                                      | 4.893311                                      |
| 6    | 3.306587                                      | 3.407458                                      | 4.701359                                      | 4.756068                                      | 2.501537                                      | 4.543083                                      | 3.860774                                      | 4.886183                                      |

**Table S5.** The vibrational frequencies (THz) of the dual-atom sites in Mn<sub>2</sub>@NG<sub>x</sub>.

| Mode | Primitive<br>Mn <sub>2</sub> @NG <sub>1</sub> | Stretched<br>Mn <sub>2</sub> @NG <sub>1</sub> | Primitive<br>Mn <sub>2</sub> @NG <sub>2</sub> | Stretched<br>Mn <sub>2</sub> @NG <sub>2</sub> | Primitive<br>Mn <sub>2</sub> @NG <sub>3</sub> | Stretched<br>Mn <sub>2</sub> @NG <sub>3</sub> | Primitive<br>Mn <sub>2</sub> @NG <sub>4</sub> | Stretched<br>Mn <sub>2</sub> @NG <sub>4</sub> |
|------|-----------------------------------------------|-----------------------------------------------|-----------------------------------------------|-----------------------------------------------|-----------------------------------------------|-----------------------------------------------|-----------------------------------------------|-----------------------------------------------|
| 1    | 10.86654                                      | 7.862315                                      | 16.57839                                      | 12.60194                                      | 12.24445                                      | 8.515272                                      | 11.9876                                       | 6.82488                                       |
| 2    | 10.60497                                      | 7.187056                                      | 12.8523                                       | 9.351011                                      | 11.89726                                      | 7.540964                                      | 11.9135                                       | 6.44016                                       |
| 3    | 10.17618                                      | 6.696281                                      | 12.22789                                      | 8.942024                                      | 10.74434                                      | 7.280371                                      | 10.5583                                       | 5.482239                                      |
| 4    | 7.63876                                       | 5.50257                                       | 11.88918                                      | 8.814127                                      | 9.432718                                      | 6.643935                                      | 9.785567                                      | 5.3378                                        |
| 5    | 2.857413                                      | 3.484858                                      | 5.024171                                      | 6.1248                                        | 4.211132                                      | 3.969435                                      | 4.867312                                      | 2.949774                                      |
| 6    | 0.72284                                       | 3.432592                                      | 4.769059                                      | 5.561691                                      | 3.929061                                      | 3.827151                                      | 4.836321                                      | 2.904429                                      |

**Table S6.** The vibrational frequencies (THz) of the dual-atom sites in Fe<sub>2</sub>@NG<sub>x</sub>.

| Mode | Primitive<br>Fe <sub>2</sub> @NG <sub>1</sub> | Stretched<br>Fe <sub>2</sub> @NG <sub>1</sub> | Primitive<br>Fe <sub>2</sub> @NG <sub>2</sub> | Stretched<br>Fe <sub>2</sub> @NG <sub>2</sub> | Primitive<br>Fe <sub>2</sub> @NG <sub>3</sub> | Stretched<br>Fe <sub>2</sub> @NG <sub>3</sub> | Primitive<br>Fe <sub>2</sub> @NG <sub>4</sub> | Stretched<br>Fe <sub>2</sub> @NG <sub>4</sub> |
|------|-----------------------------------------------|-----------------------------------------------|-----------------------------------------------|-----------------------------------------------|-----------------------------------------------|-----------------------------------------------|-----------------------------------------------|-----------------------------------------------|
| 1    | 12.52592                                      | 9.408333                                      | 16.65699                                      | 12.0361                                       | 13.48897                                      | 9.739596                                      | 13.59748                                      | 7.534686                                      |
| 2    | 11.08915                                      | 7.145488                                      | 12.55452                                      | 9.036042                                      | 12.73553                                      | 9.194515                                      | 13.58504                                      | 7.523792                                      |
| 3    | 6.870096                                      | 7.044325                                      | 12.18538                                      | 8.582297                                      | 10.61913                                      | 7.01274                                       | 10.05335                                      | 4.813346                                      |
| 4    | 3.823523                                      | 4.88875                                       | 11.98792                                      | 8.17323                                       | 10.09213                                      | 6.620564                                      | 9.343369                                      | 4.605142                                      |
| 5    | 3.692554                                      | 4.357122                                      | 7.385604                                      | 7.11841                                       | 4.396967                                      | 5.212062                                      | 5.081951                                      | 4.287425                                      |
| 6    | 1.147994                                      | 3.749691                                      | 7.073005                                      | 6.725654                                      | 0.430856                                      | 5.070294                                      | 5.033175                                      | 3.643457                                      |

**Table S7.** The vibrational frequencies (THz) of the dual-atom sites in Co<sub>2</sub>@NG<sub>x</sub>.

| Mode | Primitive<br>Co <sub>2</sub> @NG <sub>1</sub> | Stretched<br>Co <sub>2</sub> @NG <sub>1</sub> | Primitive<br>Co <sub>2</sub> @NG <sub>2</sub> | Stretched<br>Co <sub>2</sub> @NG <sub>2</sub> | Primitive<br>Co <sub>2</sub> @NG <sub>3</sub> | Stretched<br>Co <sub>2</sub> @NG <sub>3</sub> | Primitive<br>Co <sub>2</sub> @NG <sub>4</sub> | Stretched<br>Co <sub>2</sub> @NG <sub>4</sub> |
|------|-----------------------------------------------|-----------------------------------------------|-----------------------------------------------|-----------------------------------------------|-----------------------------------------------|-----------------------------------------------|-----------------------------------------------|-----------------------------------------------|
| 1    | 12.25184                                      | 7.973211                                      | 15.31767                                      | 10.34512                                      | 12.87272                                      | 8.720521                                      | 12.61556                                      | 7.832804                                      |
| 2    | 10.58849                                      | 6.155043                                      | 11.4719                                       | 8.525775                                      | 12.6219                                       | 8.344646                                      | 12.45573                                      | 7.711905                                      |
| 3    | 8.005698                                      | 5.590508                                      | 11.4003                                       | 6.594846                                      | 9.569304                                      | 6.165051                                      | 9.01337                                       | 5.57976                                       |
| 4    | 6.472915                                      | 4.361715                                      | 10.62435                                      | 6.503735                                      | 9.534731                                      | 5.798231                                      | 8.74454                                       | 5.447677                                      |
| 5    | 5.081186                                      | 3.829767                                      | 7.165859                                      | 6.28848                                       | 5.944415                                      | 5.416226                                      | 6.248193                                      | 4.740993                                      |
| 6    | 4.451782                                      | 3.370782                                      | 6.742883                                      | 5.322084                                      | 5.492194                                      | 5.2184                                        | 6.085859                                      | 4.604444                                      |

**Table S8.** The vibrational frequencies (THz) of the dual-atom sites in Ni<sub>2</sub>@NG<sub>x</sub>.

| Mode | Primitive<br>Ni <sub>2</sub> @NG <sub>1</sub> | Stretched<br>Ni <sub>2</sub> @NG <sub>1</sub> | Primitive<br>Ni <sub>2</sub> @NG <sub>2</sub> | Stretched<br>Ni <sub>2</sub> @NG <sub>2</sub> | Primitive<br>Ni <sub>2</sub> @NG <sub>3</sub> | Stretched<br>Ni <sub>2</sub> @NG <sub>3</sub> | Primitive<br>Ni <sub>2</sub> @NG <sub>4</sub> | Stretched<br>Ni <sub>2</sub> @NG <sub>4</sub> |
|------|-----------------------------------------------|-----------------------------------------------|-----------------------------------------------|-----------------------------------------------|-----------------------------------------------|-----------------------------------------------|-----------------------------------------------|-----------------------------------------------|
| 1    | 12.11077                                      | 7.913031                                      | 13.97522                                      | 10.15489                                      | 12.69963                                      | 8.277956                                      | 12.48194                                      | 5.95907                                       |
| 2    | 10.63264                                      | 6.950327                                      | 12.72472                                      | 9.226938                                      | 12.45616                                      | 7.972587                                      | 12.46924                                      | 5.952822                                      |
| 3    | 9.329102                                      | 5.145016                                      | 10.27307                                      | 6.63179                                       | 9.699919                                      | 6.023008                                      | 9.159387                                      | 4.41323                                       |
| 4    | 7.608156                                      | 4.884669                                      | 9.26779                                       | 6.212425                                      | 9.63718                                       | 5.906755                                      | 9.070503                                      | 4.286687                                      |
| 5    | 5.787589                                      | 4.645035                                      | 6.174984                                      | 6.18548                                       | 6.346794                                      | 5.83761                                       | 6.490681                                      | 3.33988                                       |
| 6    | 4.658919                                      | 4.225215                                      | 5.540971                                      | 4.690916                                      | 6.258009                                      | 5.727869                                      | 6.398068                                      | 3.314725                                      |

**Table S9.** The vibrational frequencies (THz) of the dual-atom sites in Cu<sub>2</sub>@NG<sub>x</sub>.

| Mode | Primitive<br>Cu <sub>2</sub> @NG <sub>1</sub> | Stretched<br>Cu <sub>2</sub> @NG <sub>1</sub> | Primitive<br>Cu <sub>2</sub> @NG <sub>2</sub> | Stretched<br>Cu <sub>2</sub> @NG <sub>2</sub> | Primitive<br>Cu <sub>2</sub> @NG <sub>3</sub> | Stretched<br>Cu <sub>2</sub> @NG <sub>3</sub> | Primitive<br>Cu <sub>2</sub> @NG <sub>4</sub> | Stretched<br>Cu <sub>2</sub> @NG <sub>4</sub> |
|------|-----------------------------------------------|-----------------------------------------------|-----------------------------------------------|-----------------------------------------------|-----------------------------------------------|-----------------------------------------------|-----------------------------------------------|-----------------------------------------------|
| 1    | 9.936794                                      | 6.127416                                      | 12.24375                                      | 7.443796                                      | 10.29422                                      | 6.657212                                      | 9.197751                                      | 5.462936                                      |
| 2    | 9.599072                                      | 5.675037                                      | 11.29278                                      | 7.329438                                      | 10.28591                                      | 6.427868                                      | 9.138364                                      | 5.455046                                      |
| 3    | 8.399326                                      | 4.511814                                      | 9.684853                                      | 4.993669                                      | 8.653567                                      | 4.763444                                      | 7.054827                                      | 3.74592                                       |
| 4    | 6.447607                                      | 3.881612                                      | 8.947376                                      | 4.849834                                      | 8.551016                                      | 4.559822                                      | 6.940967                                      | 3.727867                                      |
| 5    | 3.872885                                      | 3.809835                                      | 4.524553                                      | 4.16503                                       | 4.735718                                      | 4.38332                                       | 3.831015                                      | 3.500767                                      |
| 6    | 3.213826                                      | 3.436775                                      | 4.35147                                       | 4.083826                                      | 4.712221                                      | 4.217466                                      | 3.205325                                      | 3.393084                                      |

**Table S10.** The vibrational frequencies (THz) of the dual-atom sites in  $\text{Zn}_2@\text{NG}_x$ .

| Mode | Primitive<br>$\text{Zn}_2@\text{NG}_1$ | Stretched<br>$\text{Zn}_2@\text{NG}_1$ | Primitive<br>$\text{Zn}_2@\text{NG}_2$ | Stretched<br>$\text{Zn}_2@\text{NG}_2$ | Primitive<br>$\text{Zn}_2@\text{NG}_3$ | Stretched<br>$\text{Zn}_2@\text{NG}_3$ | Primitive<br>$\text{Zn}_2@\text{NG}_4$ | Stretched<br>$\text{Zn}_2@\text{NG}_4$ |
|------|----------------------------------------|----------------------------------------|----------------------------------------|----------------------------------------|----------------------------------------|----------------------------------------|----------------------------------------|----------------------------------------|
| 1    | 9.93665                                | 7.34519                                | 8.661405                               | 7.493182                               | 8.488067                               | 6.920357                               | 8.916262                               | 5.951318                               |
| 2    | 9.708174                               | 7.28671                                | 7.235698                               | 6.131473                               | 8.266858                               | 6.640684                               | 8.806532                               | 5.866168                               |
| 3    | 8.488516                               | 5.532864                               | 6.826001                               | 5.78292                                | 6.713467                               | 4.685273                               | 7.404447                               | 4.332158                               |
| 4    | 7.195947                               | 5.462043                               | 6.5276                                 | 5.390046                               | 6.367172                               | 4.318999                               | 7.34738                                | 4.208906                               |
| 5    | 2.402408                               | 3.286837                               | 3.628901                               | 3.761667                               | 3.738533                               | 3.81539                                | 2.647068                               | 3.668372                               |
| 6    | 1.880129                               | 2.893935                               | 2.788773                               | 3.193196                               | 3.584572                               | 3.793533                               | 2.520754                               | 3.603826                               |

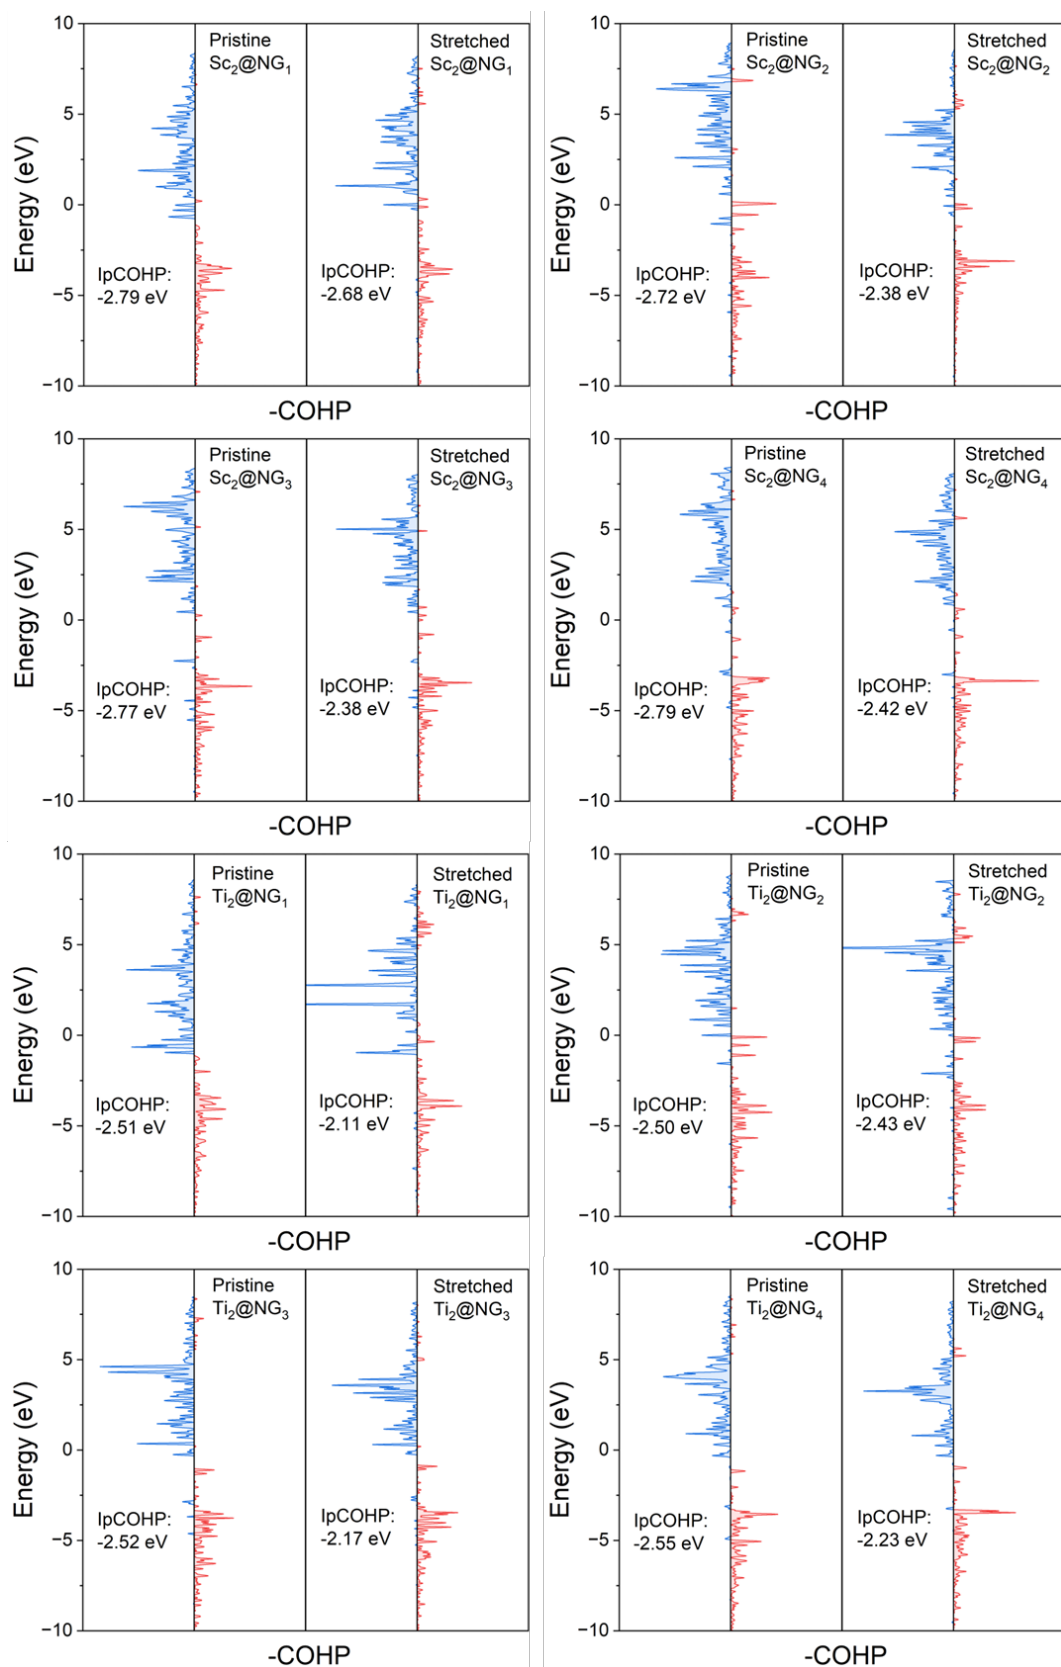

**Figure S10.** COHP curves of the M-N bond in Sc<sub>2</sub>@NG<sub>x</sub> and Ti<sub>2</sub>@NG<sub>x</sub>.

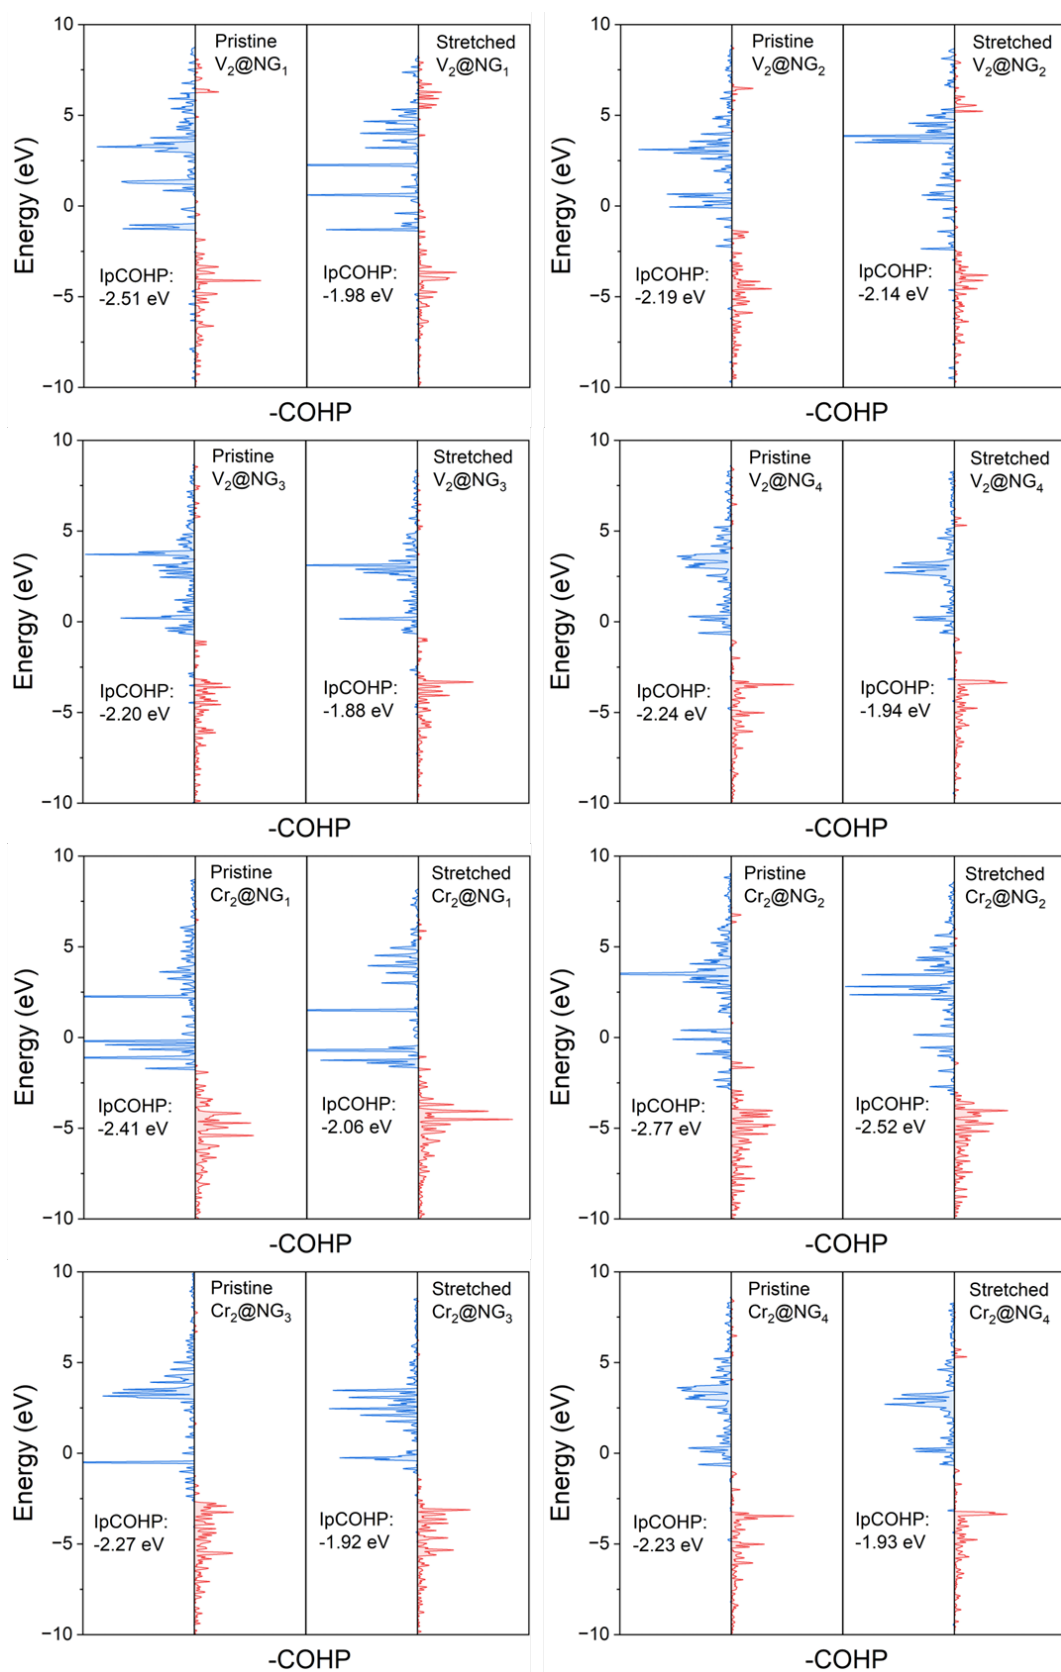

**Figure S11.** COHP curves of the M-N bond in V<sub>2</sub>@NG<sub>x</sub> and Cr<sub>2</sub>@NG<sub>x</sub>.

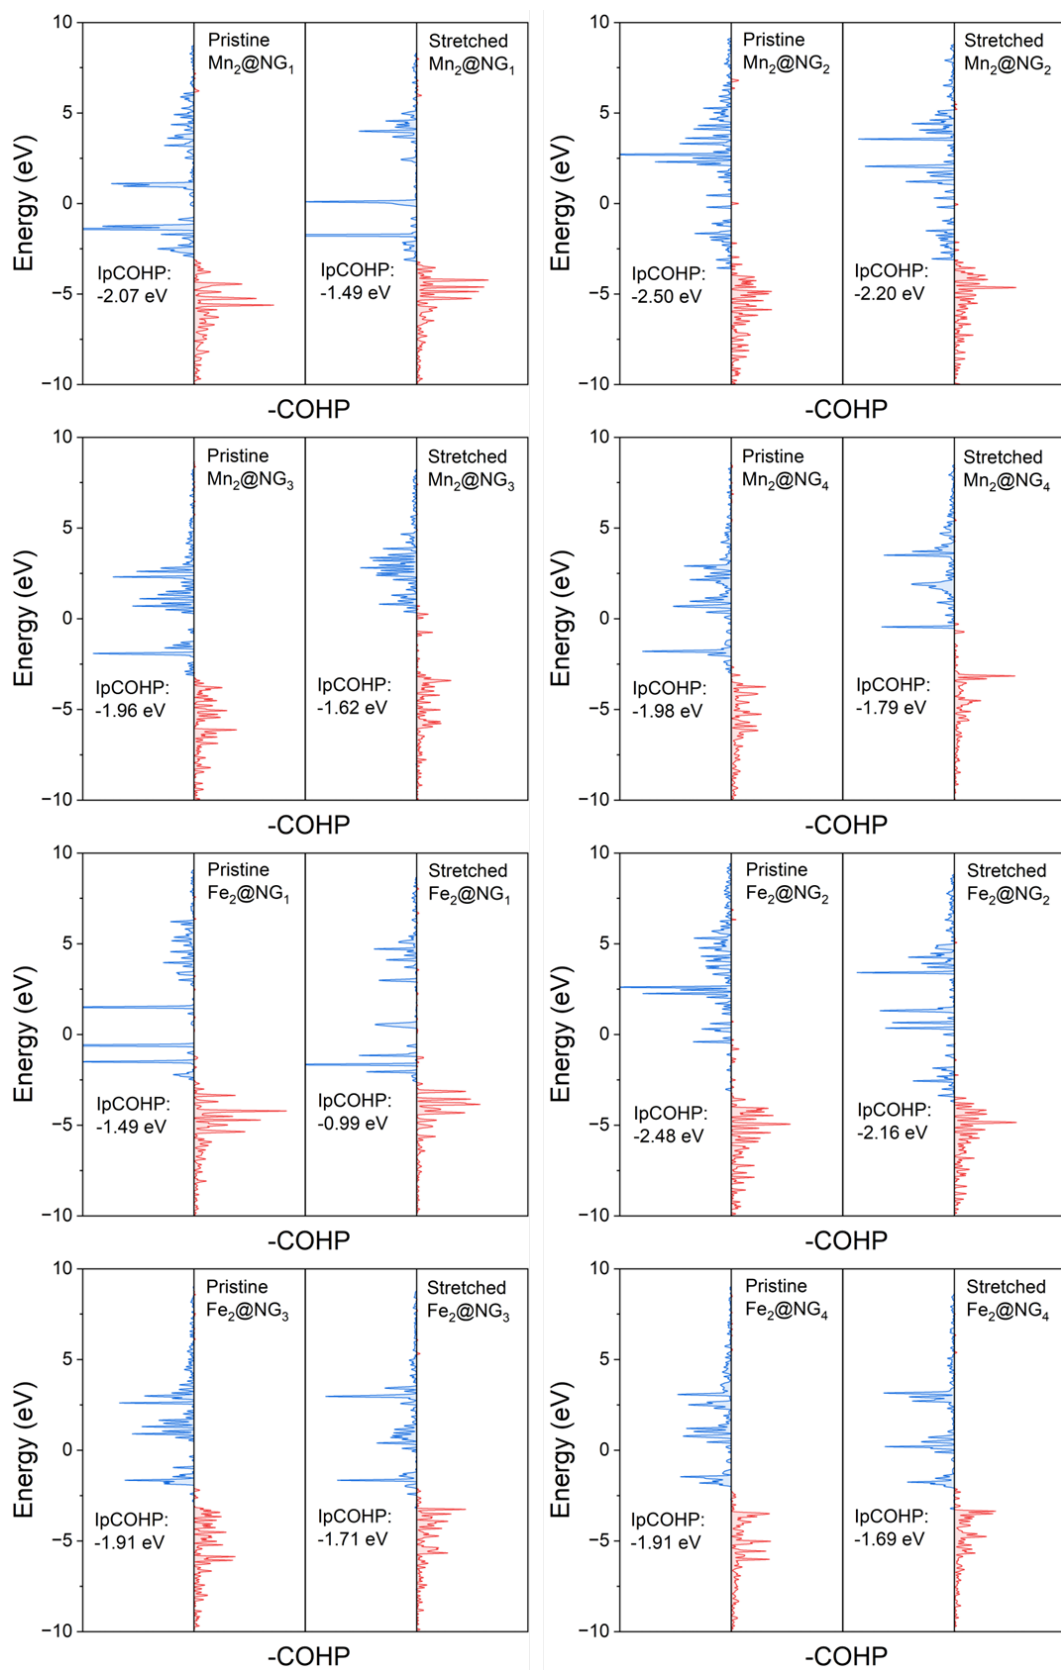

**Figure S12.** COHP curves of the M-N bond in Mn<sub>2</sub>@NG<sub>x</sub> and Fe<sub>2</sub>@NG<sub>x</sub>.

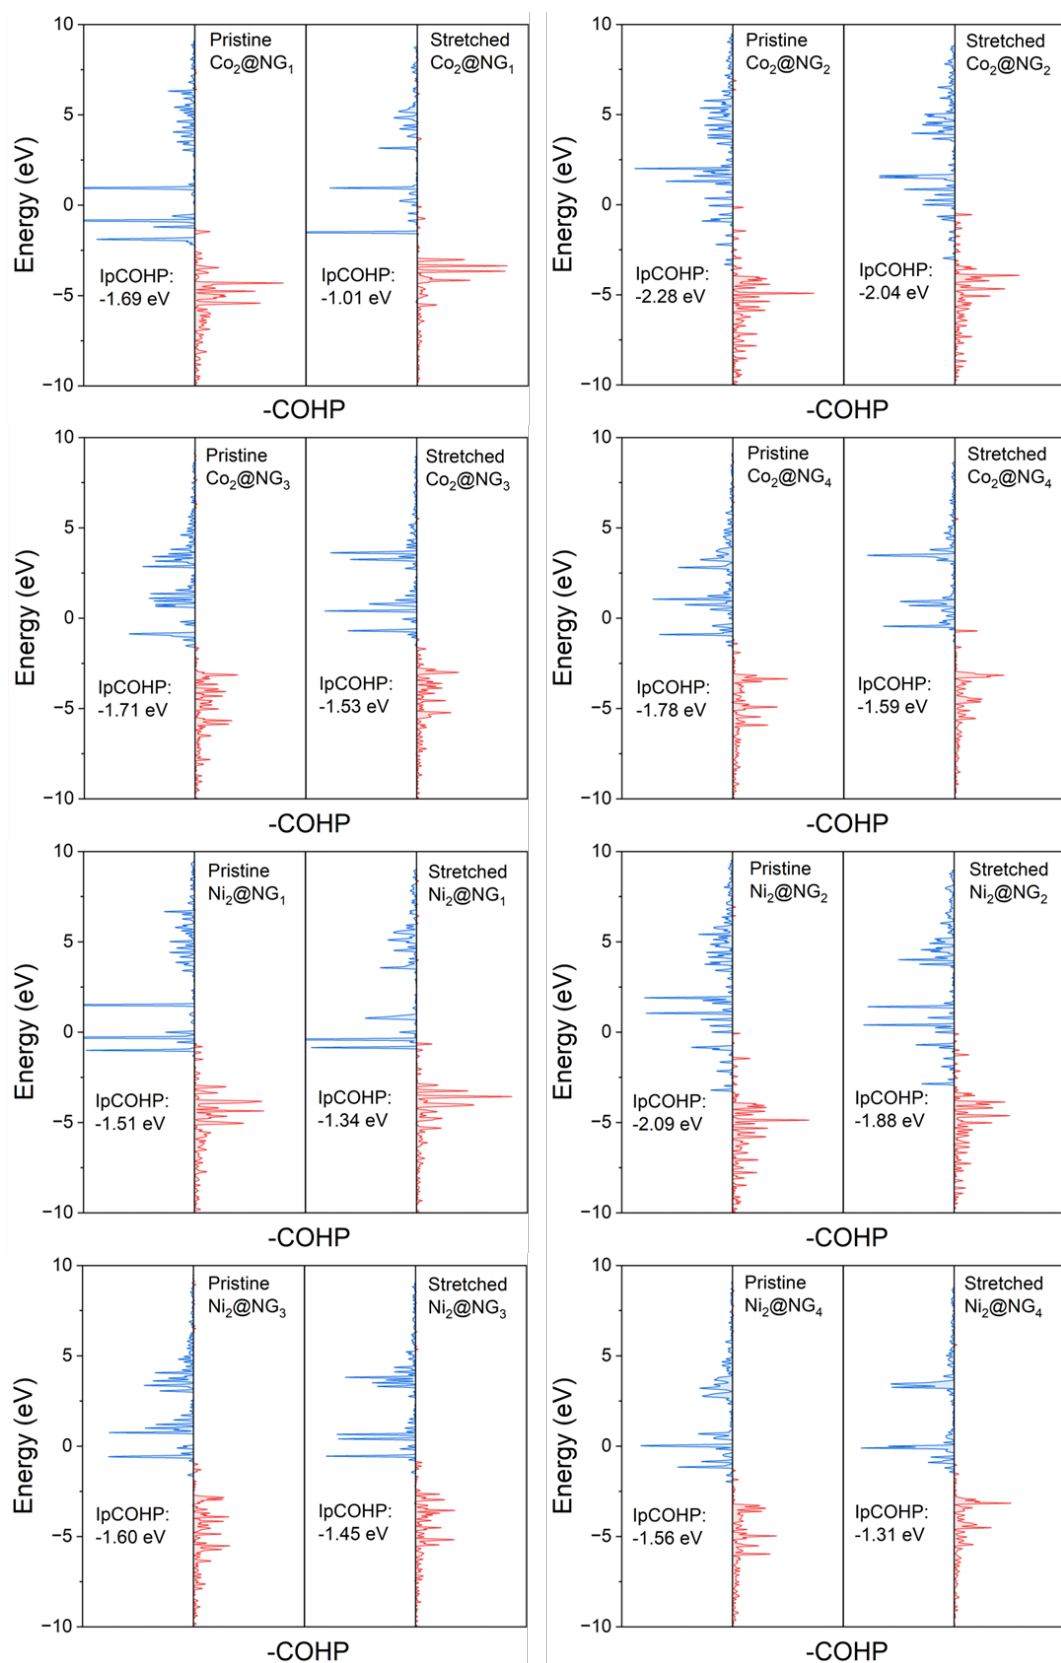

**Figure S13.** COHP curves of the M-N bond in Co<sub>2</sub>@NG<sub>x</sub> and Ni<sub>2</sub>@NG<sub>x</sub>.

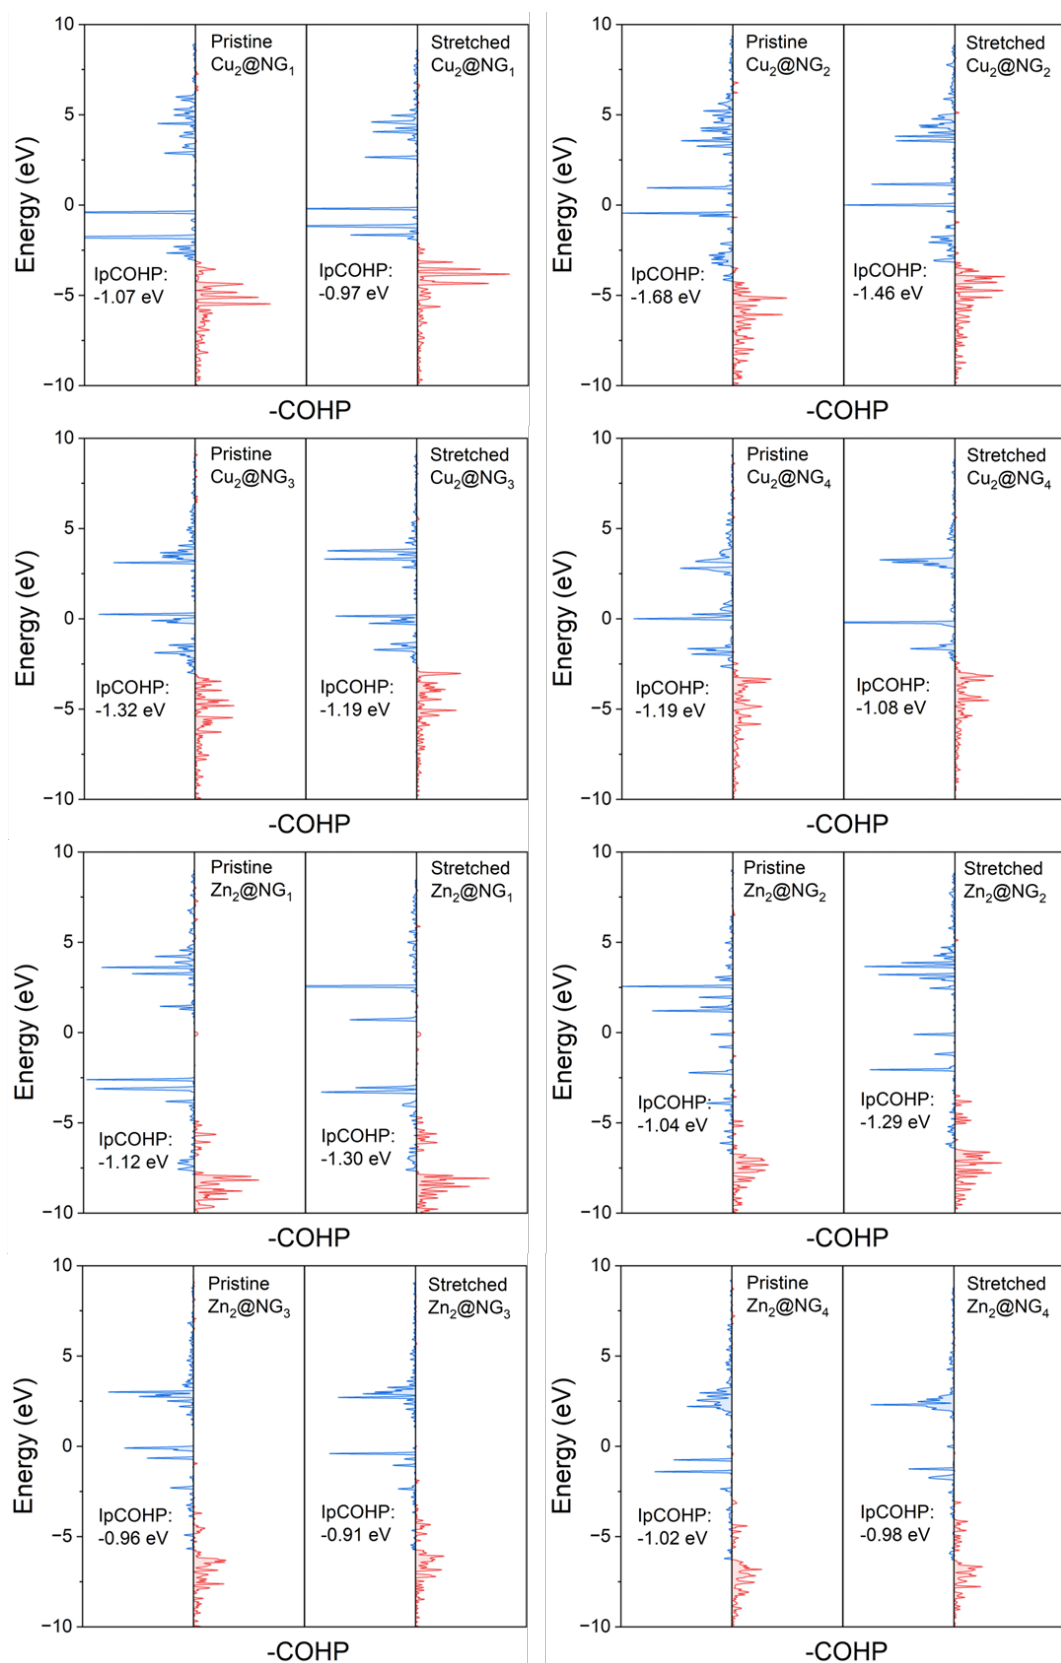

**Figure S14.** COHP curves of the M-N bond in Cu<sub>2</sub>@NG<sub>x</sub> and Zn<sub>2</sub>@NG<sub>x</sub>.

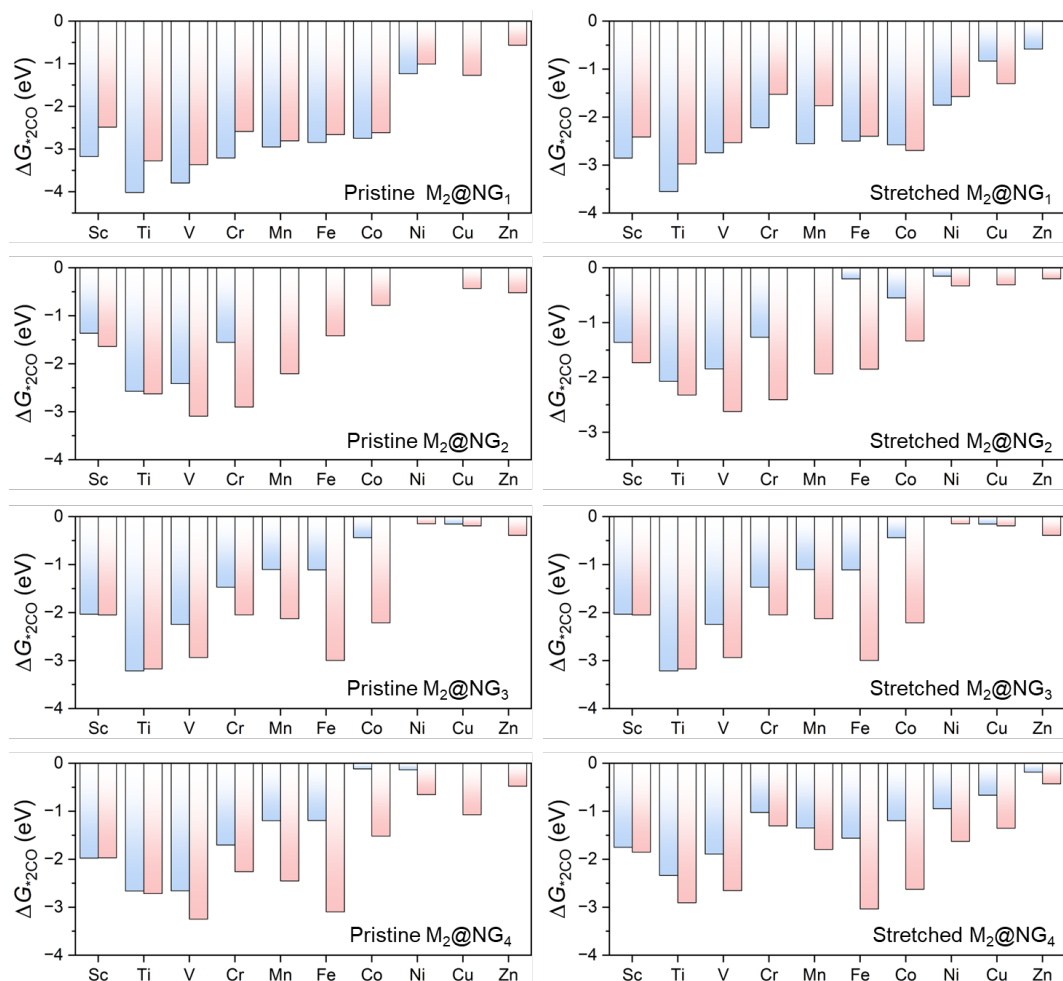

**Figure S15.** Adsorption energies of two CO molecules on  $M_2@NG_x$  in top-bridged (blue bars) and top-top (red bars) configurations.

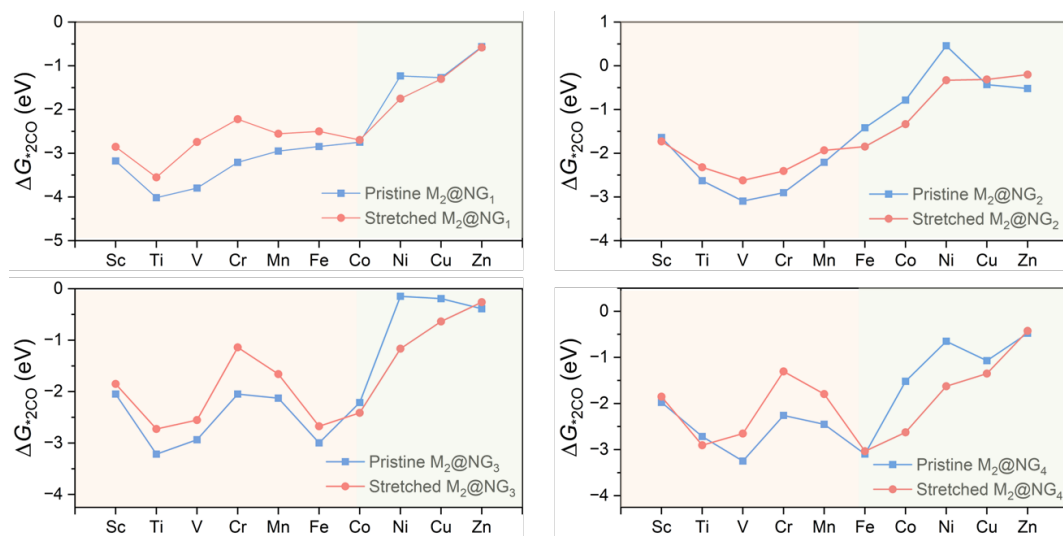

**Figure S16.** Comparison of the most stable adsorption energies of two CO molecules on pristine  $M_2@NG_x$  and stretched  $M_2@NG_x$ .

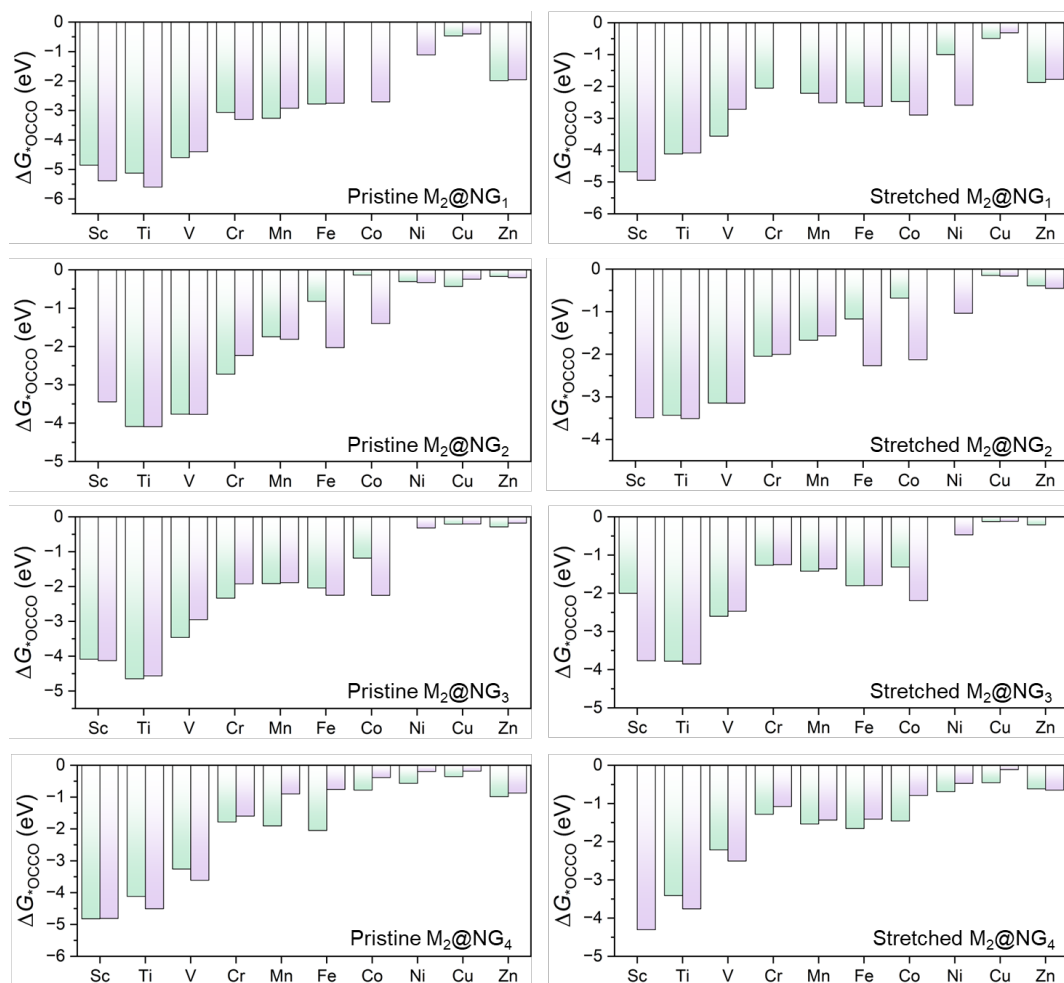

**Figure S17.** Adsorption energies of  $*\text{OCCO}$  molecules on  $\text{M}_2@ \text{NG}_x$  with single-site (green bars) and dual-site (purple bars) configurations.

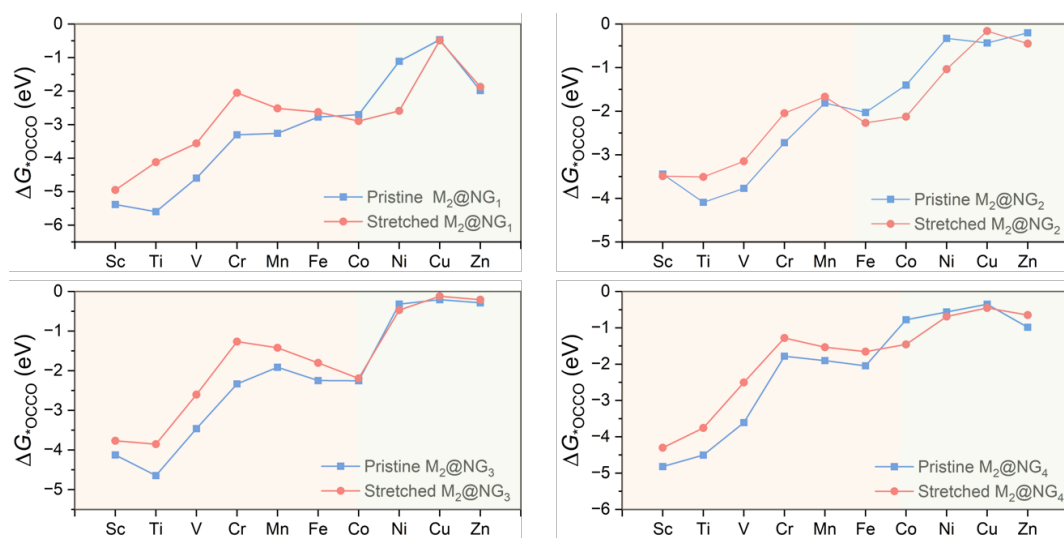

**Figure S18.** Comparison of the most stable adsorption energies of  $*\text{OCCO}$  molecules on pristine  $\text{M}_2@ \text{NG}_x$  and stretched  $\text{M}_2@ \text{NG}_x$ .

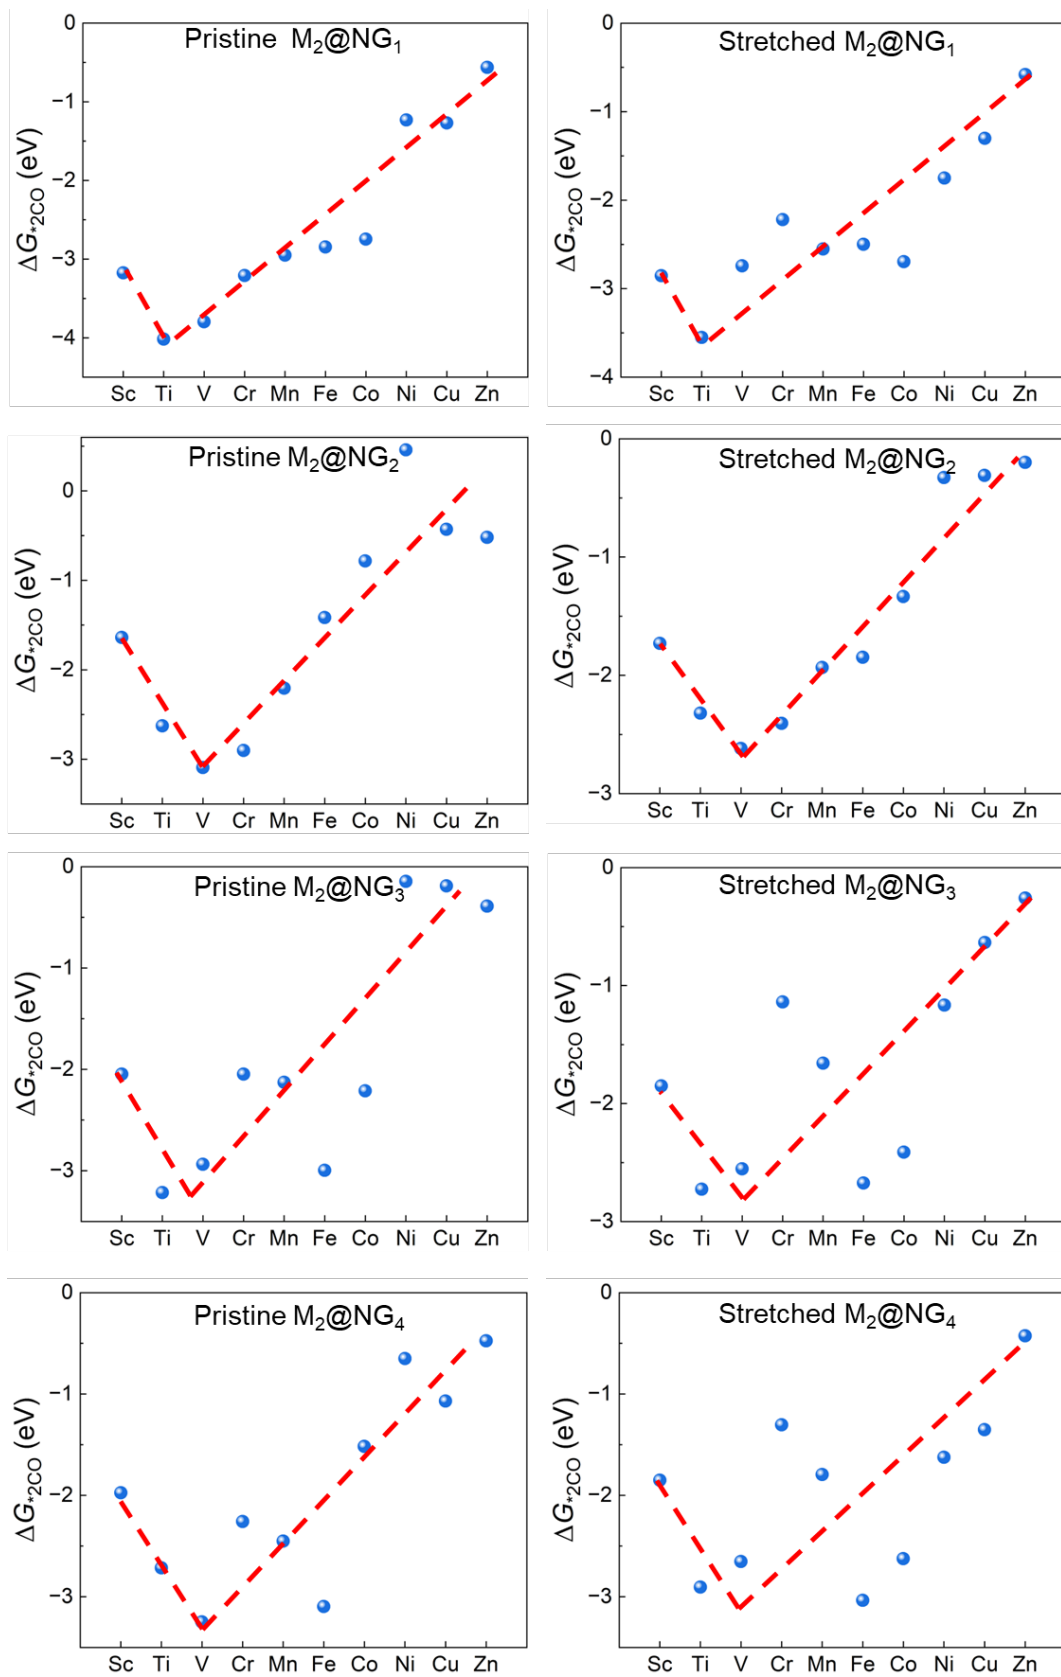

**Figure S19.** Adsorption energies of two CO molecules as a function of metal identity in  $M_2@NG_x$ .

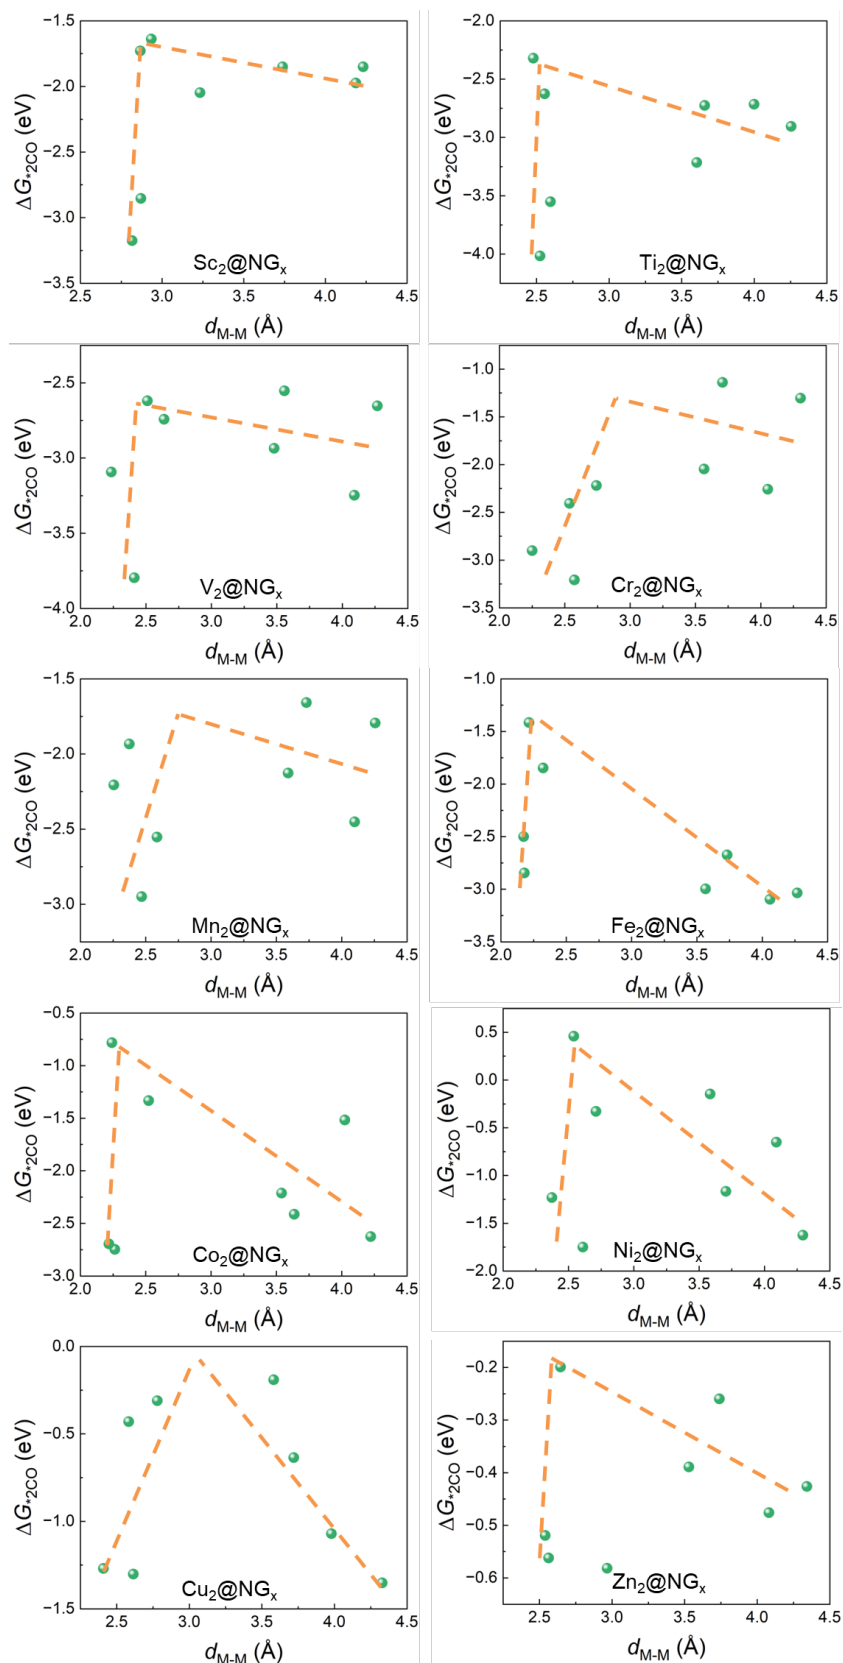

**Figure S20.** Adsorption energies of two CO molecules as a function of metal–metal distance in  $M_2@NG_x$ .

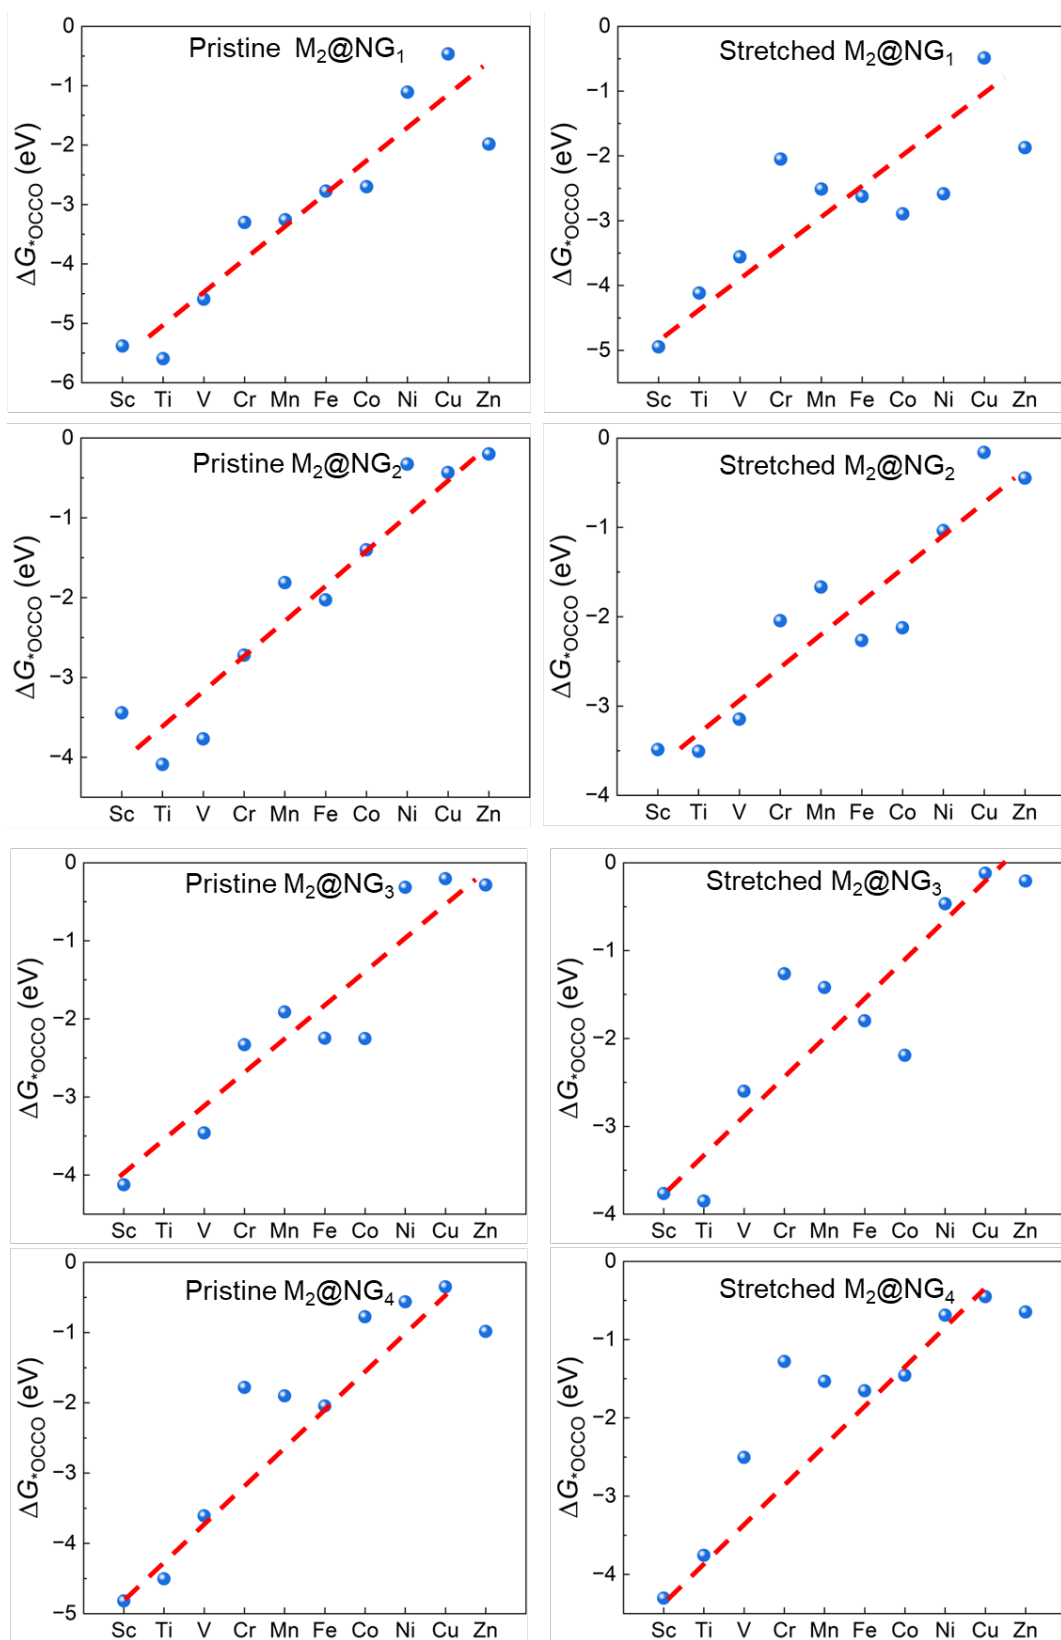

**Figure S21.** Adsorption energies of  $^*OCCO$  molecules as a function of metal identity in  $M_2@NG_x$ .

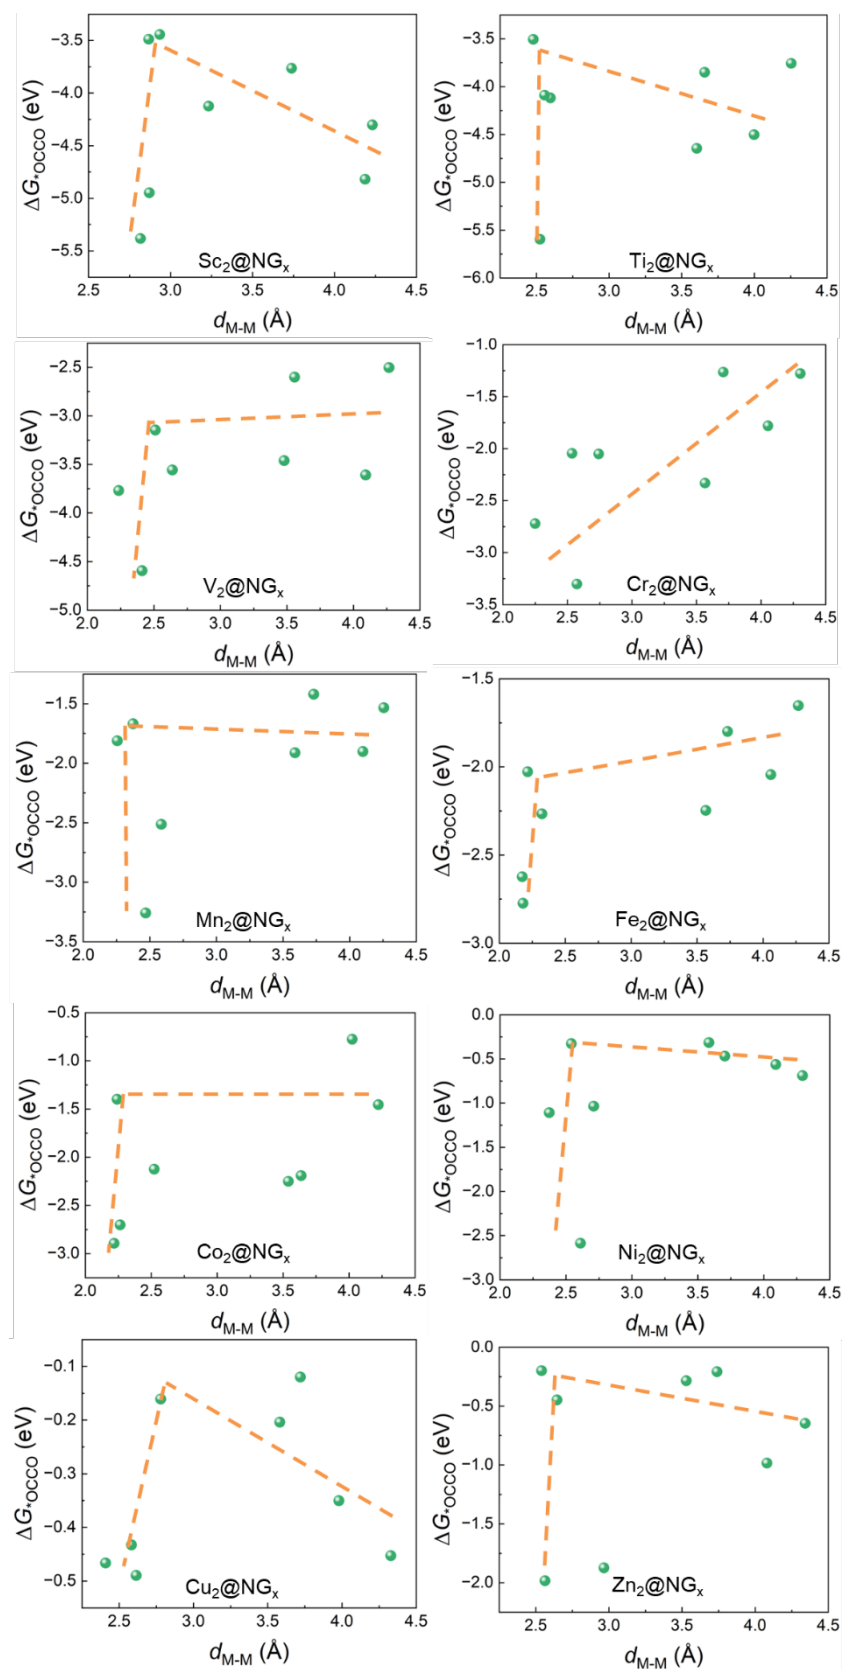

**Figure S22.** Adsorption energies of  $*\text{OCCO}$  molecules as a function of metal-metal distance in  $\text{M}_2@NG_x$ .

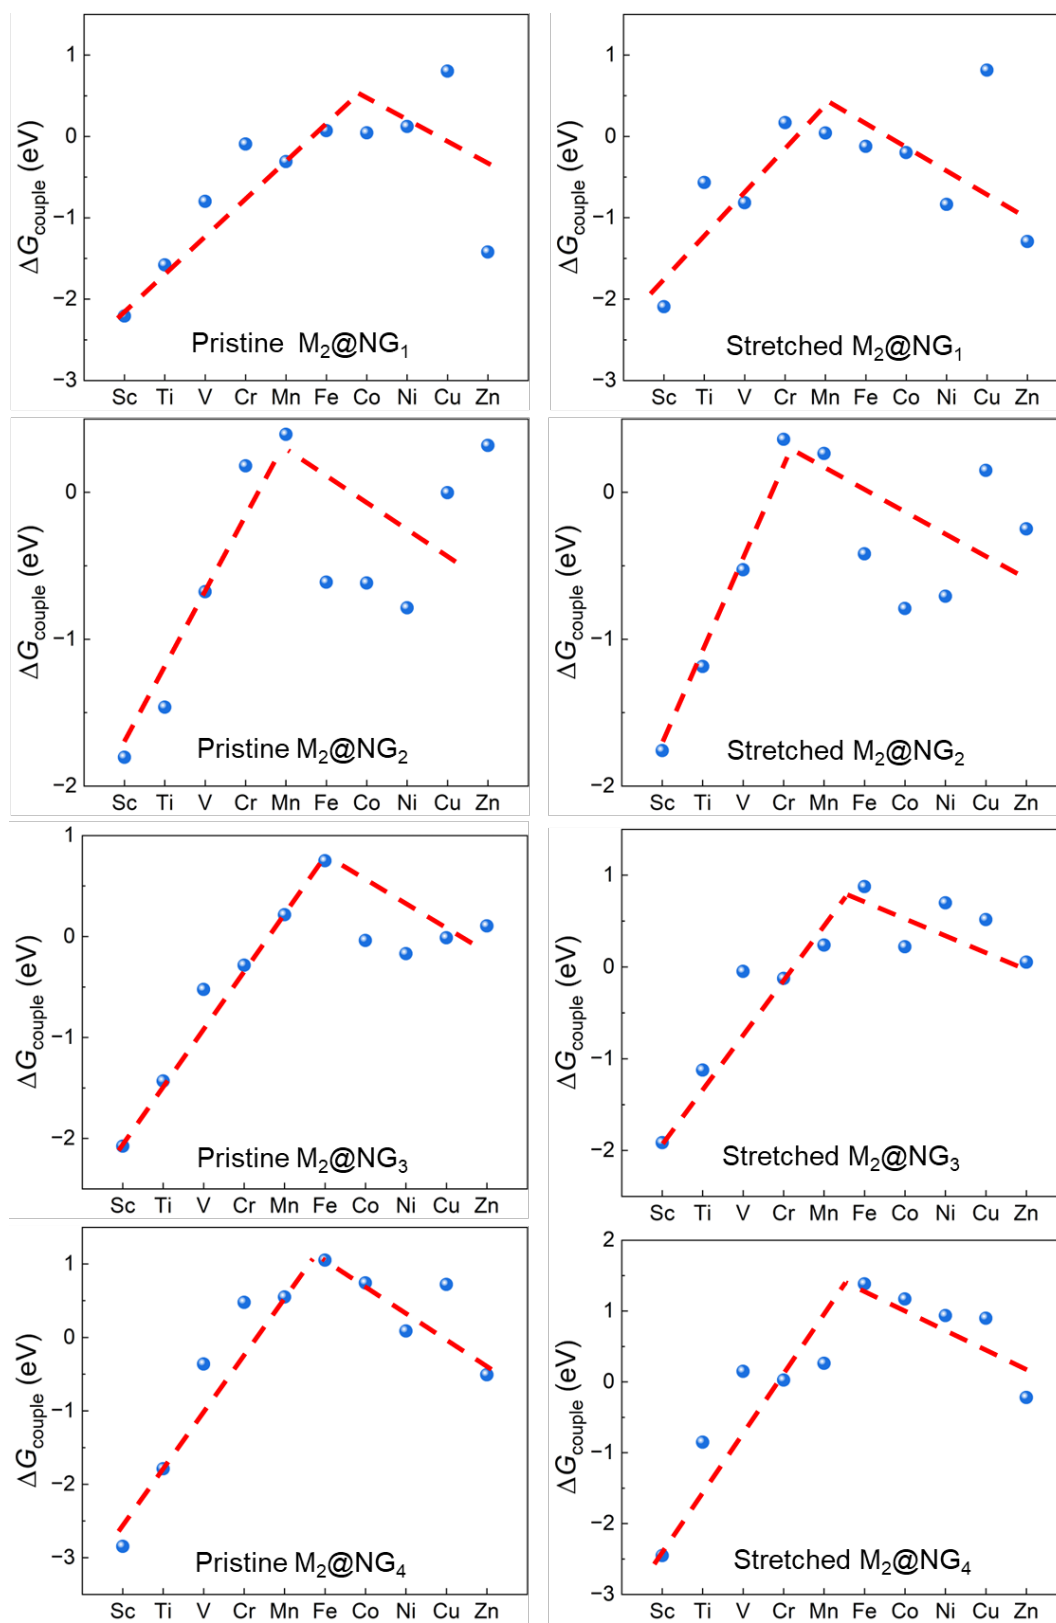

**Figure S23.** C-C coupling energies as a function of metal identity in  $M_2@NG_x$ .

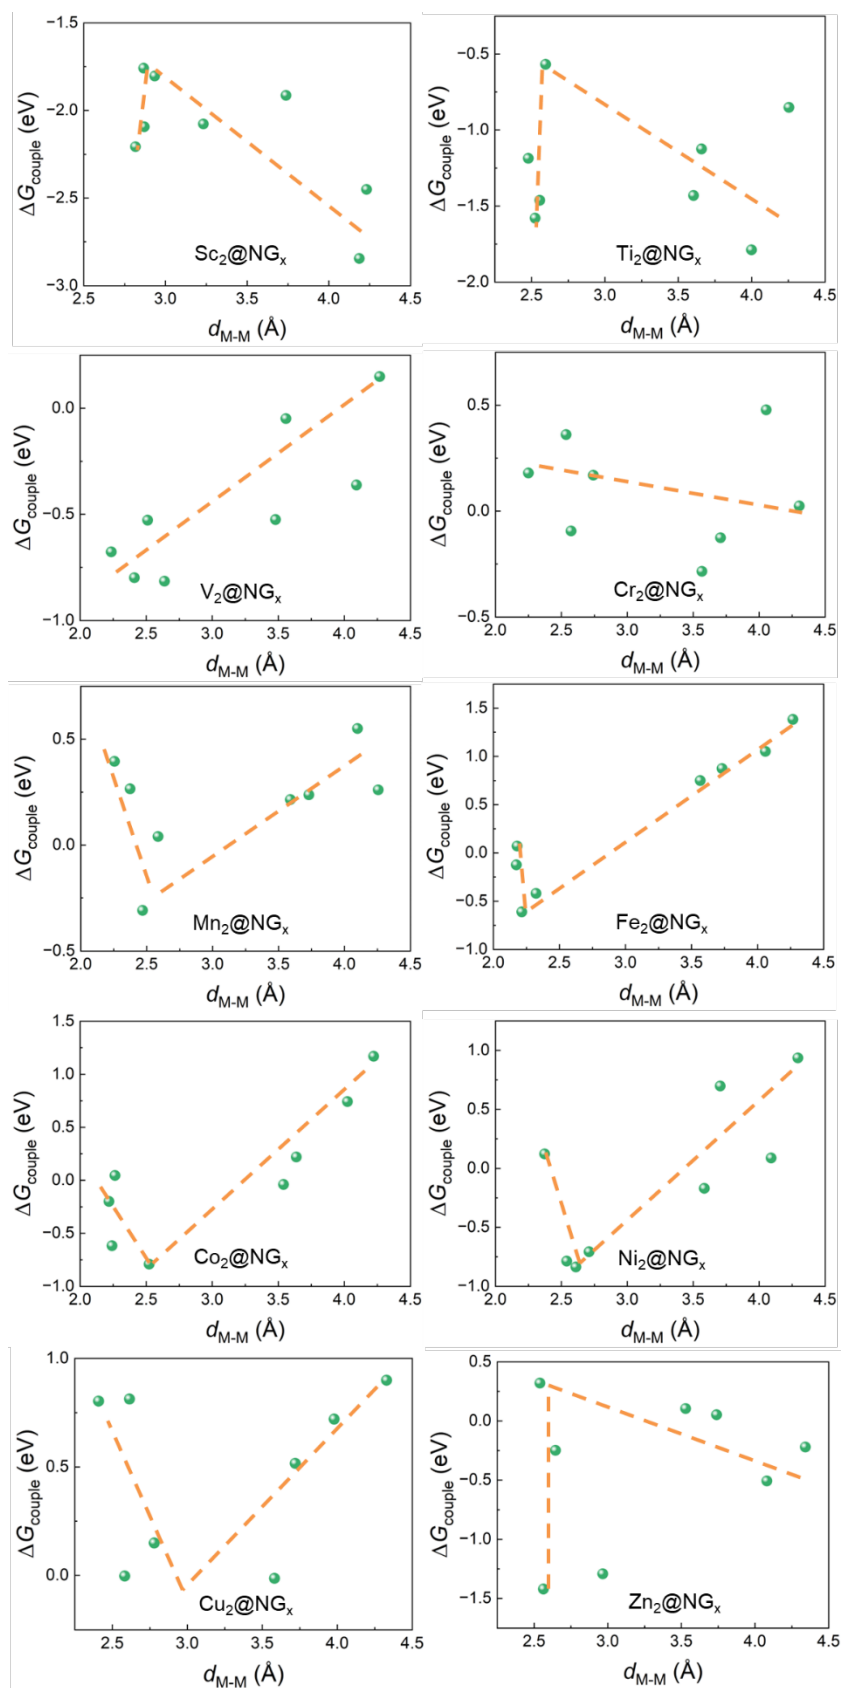

**Figure S24.** C–C coupling energies as a function of metal–metal distance in  $M_2@NG_x$ .

**Table S11.** Primary features used in this work.

| Symbol        | Physical meaning                         | Symbol          | Physical meaning                       |
|---------------|------------------------------------------|-----------------|----------------------------------------|
| $N_M^{VE}$    | Number of metal valence electrons        | $R_M^{CR}$      | Covalent radius of metal               |
| $N_M^{men}$   | Mendeleev number of metal <sup>[1]</sup> | $R_M^{vdw}$     | Van der Waals radius of metal          |
| $N_M^{group}$ | Group of metal                           | $R_M^{atom}$    | Atomic radius of metal                 |
| $N_M^{atom}$  | Atomic number of metal                   | $R_M^{ion}$     | Ionic radius of metal                  |
| $E_M^{ion}$   | First ionization energy of metal         | $N_N^{dop}$     | The number of N dopants in the support |
| $E_M^{EA}$    | Electronic affinity of metal             | $N_{MN}^{coor}$ | N coordination number of metal         |
| $\chi_M$      | Pauling electronegativity of metal       | $d_{MM}$        | Metal–metal distance                   |
| $C_M^{TC}$    | Thermal conductivity of metal            | $S_{ratio}$     | Stretching ratio of catalyst           |

[1] Villars, P.; Cenzual, K.; Daams, J.; Chen, Y.; Iwata, S., Data-driven atomic environment prediction for binaries using the Mendeleev number: Part 1. Composition AB. Journal of Alloys and Compounds 2004, 367 (1), 167-175.

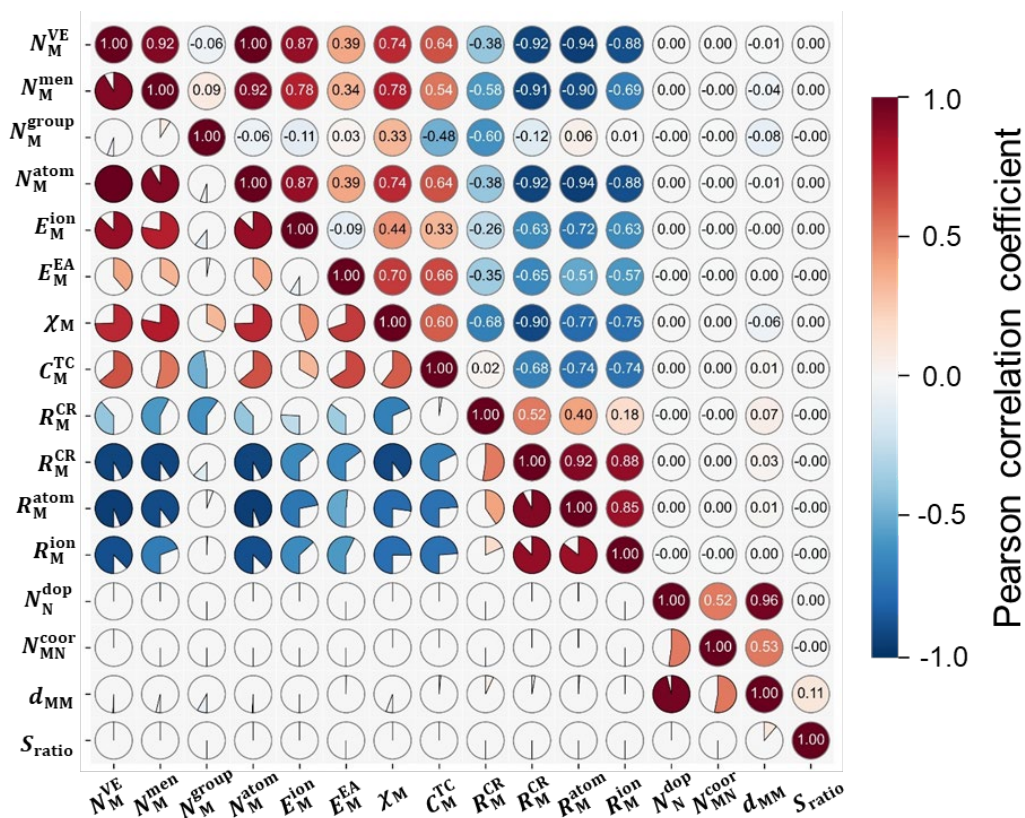

Figure S25. Pearson correlation coefficients among all primary features.

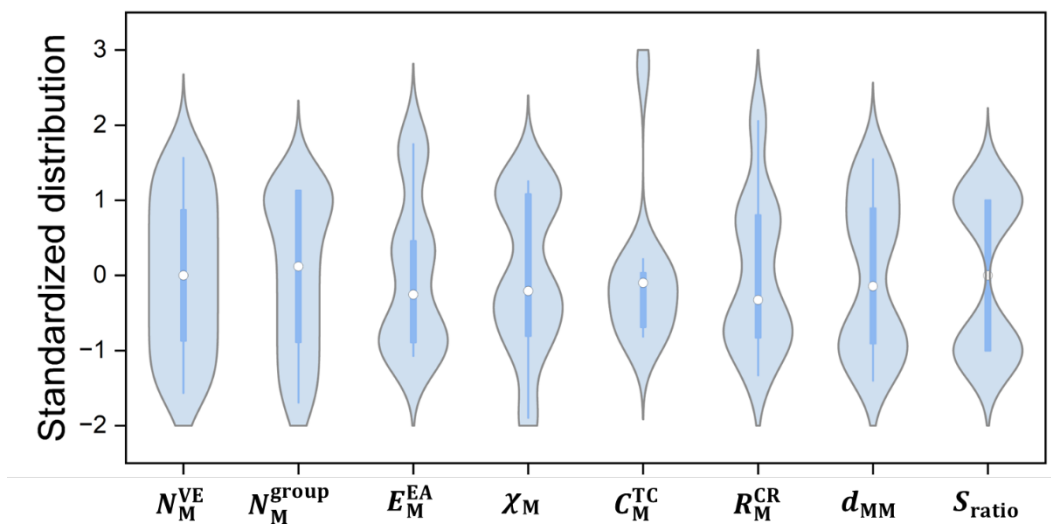

Figure S26. Pearson correlation coefficients among all screened primary features.
